# Supplementary material for: Genomic evidence of functional diversity in DPANN archaea, from oxic species to anoxic vampiristic consortia
Source: PubMed Central journal article supplement (PMC9723730; doi:10.1038/s43705-022-00088-6), 2022-01-20

**Supplementary Figure 1.** Archaeal community composition of the Lake A samples. Relative proportion of archaeal lineages identified in Lake A using the metagenomic dataset (M), or by DNA-based (D) and RNA-based (R) 16S rRNA gene sequencing.

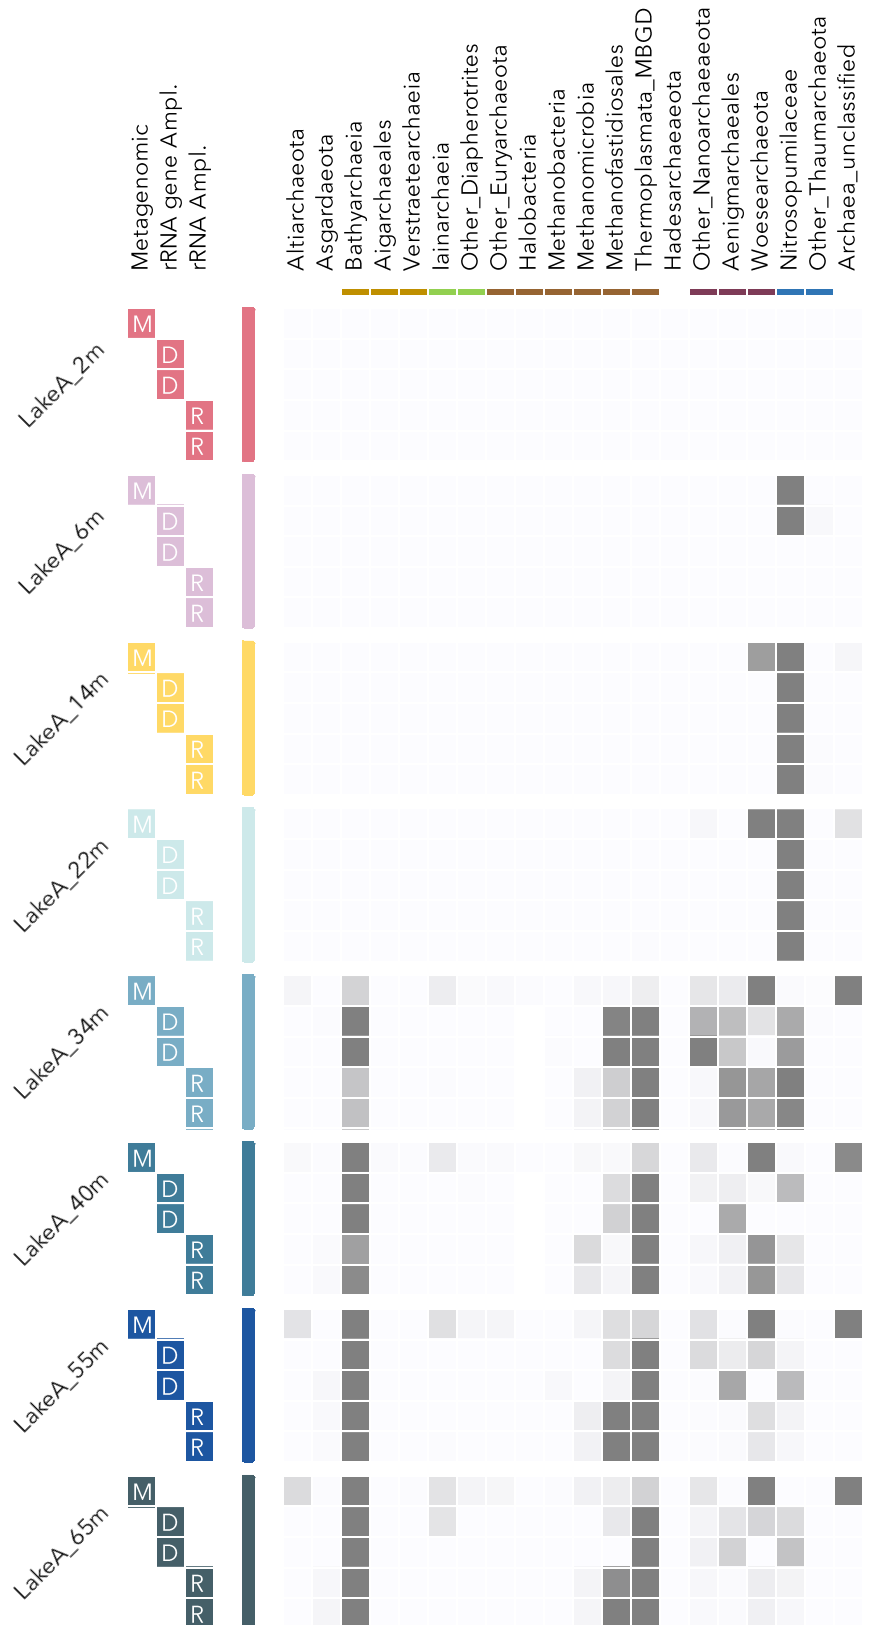

Supplement: 43705_2022_88_MOESM2_ESM.pdf [file 43705_2022_88_MOESM2_ESM.pdf]
