# Supplementary material for: Genomic evidence of functional diversity in DPANN archaea, from oxic species to anoxic vampiristic consortia
Source: PubMed Central journal article supplement (PMC9723730; doi:10.1038/s43705-022-00088-6), 2022-01-20
Supplement: 43705_2022_88_MOESM4_ESM.pdf [file 43705_2022_88_MOESM4_ESM.pdf]

7)'1.0:g\_\_Halobellus':0.0280929,(((RS\_GCF\_000237865.1:0.029305,GB\_GCA\_000415965.1:0.027214  
2)0.974:0.0152584,GB\_GCA\_000415985.1:0.0414075)1.0:0.0874373,GB\_GCA\_000416005.1:0.18987  
2)'1.0:g\_\_Haloquadratum':0.0781858)1.0:0.0403342,(((RS\_GCF\_000172995.2:0.0352793,RS\_GCF\_9  
00112175.1:0.0301297)0.996:0.0153945,RS\_GCF\_000337095.1:0.0500559)0.558:0.0109523,RS\_GCF  
\_900115785.1:0.0462417)'1.0:g\_\_Halogeometricum':0.0367201,(RS\_GCF\_900100875.1:0.0236341,R  
S\_GCF\_900113245.1:0.0380614)'1.0:g\_\_Halopelagius':0.0491901)0.987:0.0197397)1.0:0.0292572,(((  
(((RS\_GCF\_000337795.1:0.00371579,RS\_GCF\_000337835.1:0.00267702)0.99:0.00361983,RS\_GCF\_  
001368915.1:0.00817474)0.778:0.0033331,RS\_GCF\_000025685.1:0.0117763)0.96:0.00452092,RS\_G  
CF\_001469875.2:0.00420693)0.589:0.0028303,((RS\_GCF\_000336775.1:0.00348563,RS\_GCF\_000336  
815.1:0.00590086)0.996:0.00347496,RS\_GCF\_001482285.1:0.00411501)0.894:0.00283026)1.0:0.028  
6701,(RS\_GCF\_000306765.2:0.0247717,RS\_GCF\_000337815.1:0.0251916)1.0:0.0145888)1.0:0.01366  
08,((RS\_GCF\_001469865.1:0.00847919,RS\_GCF\_009674605.1:0.00556349)0.998:0.00984308,(RS\_GC  
F\_009674585.1:0.0195819,RS\_GCF\_009674625.1:0.0225298)0.969:0.00794319)1.0:0.0206229)0.993  
:0.0138932,(RS\_GCF\_000336755.1:0.00606194,RS\_GCF\_000336955.1:0.00570274)1.0:0.0330193)'1.  
0:g\_\_Haloferax':0.0919019)0.998:0.0230166,((RS\_GCF\_002906575.1:0.0334296,RS\_GCF\_007004735.  
1:0.031151)1.0:0.0255722,RS\_GCF\_009176545.1:0.0493236)'1.0:g\_\_Salinigranum':0.0956929)0.999:  
0.01966,(((RS\_GCF\_900110465.1:0.0324896,RS\_GCF\_900114455.1:0.031228)1.0:0.0230676,RS\_GCF  
\_900103715.1:0.0388411)'1.0:g\_\_Halogramum':0.0630498,(RS\_GCF\_002844195.1:0.0457511,RS\_GCF  
\_004116405.1:0.05713)'1.0:g\_\_Halegenticoccus':0.0535718)0.967:0.0201959,(RS\_GCF\_001469955.1:  
0.0252065,RS\_GCF\_003439925.1:0.0193595)'1.0:g\_\_Haloprofundus':0.0916516)1.0:0.0237869)1.0:0.  
0293221)0.53:0.0142015,((((RS\_GCF\_003336245.1:0.0387139,RS\_GCF\_003342675.1:0.0152371)1.0  
:0.0152162,RS\_GCF\_000427685.1:0.0349292)1.0:0.016877,RS\_GCF\_003856835.1:0.0413947)0.661:0.  
.00991914,RS\_GCF\_900107665.1:0.0536367)0.418:0.0188454,RS\_GCF\_009762275.1:0.0479866)'1.0:  
g\_\_Haloplanus':0.0819997,GB\_GCA\_000496195.1:0.238229)0.659:0.0377511)'1.0:f\_\_Haloferaceae  
'0.069339,((((((((((((((((RS\_GCF\_000337615.1:0.0120892,RS\_GCF\_000731985.1:0.00597296)0.9  
95:0.00575659,RS\_GCF\_000337175.1:0.00877404)1.0:0.026412,(RS\_GCF\_000337195.1:0.0160152,R  
S\_GCF\_005576615.1:0.0110255)1.0:0.017271)0.923:0.00786416,RS\_GCF\_002494345.1:0.030609)0.0  
:0.00549709,RS\_GCF\_900110865.1:0.036869)0.873:0.00617895,(RS\_GCF\_002572525.1:0.017157,RS  
\_GCF\_013456555.1:0.0244107)1.0:0.023655)0.999:0.00925689,((RS\_GCF\_000230735.2:0.00502858,  
RS\_GCF\_000337115.1:0.00467936)1.0:0.00733258,(GB\_GCA\_000690595.2:0.0116046,RS\_GCF\_0019  
53745.1:0.0118653)0.745:0.00448883)1.0:0.0283493)0.718:0.00759582,(((RS\_GCF\_000337475.1:0.0  
0923348,RS\_GCF\_900111485.1:0.0120251)0.262:0.0036261,RS\_GCF\_004217335.1:0.00697202)1.0:0.  
.0100493,RS\_GCF\_005938085.1:0.017619)1.0:0.0284977)0.99:0.00928843,RS\_GCF\_013402815.1:0.0  
554873)0.866:0.00916707,RS\_GCF\_900110455.1:0.0470818)'1.0:g\_\_Natrinema':0.0173335,((((RS\_  
GCF\_004799645.1:0.0228708,RS\_GCF\_900156475.1:0.026232)0.925:0.0110532,RS\_GCF\_000337735.  
1:0.0169349)0.284:0.00784626,RS\_GCF\_009392895.1:0.0224075)1.0:0.0303954,RS\_GCF\_003670115  
.1:0.0518996)0.962:0.0125011,((RS\_GCF\_000383975.1:0.0130614,RS\_GCF\_900100335.1:0.0136456)  
1.0:0.0286854,(RS\_GCF\_001971705.1:0.00789227,RS\_GCF\_900108095.1:0.00603214)1.0:0.0572626)  
0.996:0.0123939)0.0:0.00473829,RS\_GCF\_009834785.1:0.0463367)'0.999:g\_\_Natronorubrum':0.016  
7474,(((RS\_GCF\_000337495.1:0.00577732,RS\_GCF\_003977755.1:0.0066818)0.323:0.00290421,RS\_  
GCF\_013342135.1:0.00925521)0.996:0.00846021,RS\_GCF\_000025325.1:0.0113774)'1.0:g\_\_Haloterri  
gena':0.0394273,RS\_GCF\_000337215.1:0.0518943)0.334:0.0134114)0.998:0.0132856)0.976:0.00824  
834,((((RS\_GCF\_000226975.2:0.0106758,RS\_GCF\_900112205.1:0.00664787)'1.0:g\_\_Halobiforma':0.  
0368945,RS\_GCF\_000337895.1:0.037725)0.997:0.0117901,(RS\_GCF\_000230715.2:0.0535806,RS\_GC  
F\_900104065.1:0.0292353)1.0:0.0184636)1.0:0.0215674,RS\_GCF\_000455365.1:0.050321)0.462:0.00  
984008,((RS\_GCF\_000217715.1:0.0124144,RS\_GCF\_003610195.1:0.0127515)'1.0:g\_\_Halopiger':0.02  
61134,(RS\_GCF\_002177135.1:0.0238171,RS\_GCF\_011043775.1:0.0202917)'1.0:g\_\_Natronolimnobi  
s':0.0502634)0.993:0.0119222)0.908:0.00609903)0.911:0.00662594,(((RS\_GCF\_000337575.1:0.0068

3175,RS\_GCF\_001861355.1:0.00850293)0.966:0.00378128,RS\_GCF\_000025625.1:0.0117571)0.677:0.00464092,RS\_GCF\_000337135.1:0.0135166)1.0:0.0332836,((RS\_GCF\_000337535.1:0.00620374,RS\_GCF\_000337595.1:0.0102219)0.549:0.00425893,RS\_GCF\_000337555.1:0.00992936)1.0:0.0421896)'1.0:g\_\_Natrialba':0.0336308)0.592:0.00819745,(RS\_GCF\_000455345.1:0.0571063,RS\_GCF\_006543045.1:0.0658524)0.997:0.0138726)0.0:0.00675916,(((RS\_GCF\_000328685.1:0.0298875,RS\_GCF\_000337695.1:0.0303054)0.2:0.00842968,(RS\_GCF\_000337675.1:0.0160146,GB\_GCA\_003559215.1:0.016377)1.0:0.0138299)1.0:0.0294295,RS\_GCF\_008122205.1:0.0457569)'1.0:g\_\_Natronococcus':0.030578)0.99:0.0105445,((RS\_GCF\_003841465.1:0.0537897,RS\_GCF\_003841485.1:0.057123)0.784:0.0100285,(RS\_GCF\_003841505.1:0.040807,RS\_GCF\_008245225.1:0.0506193)0.996:0.0149366)'1.0:g\_\_Natrarchaeobius':0.0177944)0.574:0.011303,(((GB\_GCA\_001563805.1:0.0219572,RS\_GCF\_003430825.1:0.0230918)1.0:0.0312175,RS\_GCF\_002156705.1:0.0509798)0.955:0.0131588,GB\_GCA\_001563885.1:0.0639658)'0.999:g\_\_Natrarchaeobaculum':0.0145544)1.0:0.0241958,(((RS\_GCF\_000691505.1:0.0083341,RS\_GCF\_900116205.1:0.0103601)1.0:0.0143927,RS\_GCF\_000517625.1:0.0197746)'1.0:g\_\_Halostagnicola':0.0696377,((GB\_GCA\_001564285.1:0.00110037,GB\_GCA\_003552325.1:0.00166548)1.0:0.060113,GB\_GCA\_001564275.1:0.0560359)'1.0:g\_\_Tc-Br11':0.0744489)0.373:0.0194644)0.963:0.0183881,(((RS\_GCF\_000328525.1:0.00830782,RS\_GCF\_00337515.1:0.0118905)1.0:0.072139,GB\_GCA\_007135505.1:0.0677144)1.0:0.0343906,GB\_GCA\_00719345.1:0.0793338)'1.0:g\_\_Halovivax':0.0513232)0.294:0.0106102,((GB\_GCA\_001564115.1:0.0280892,GB\_GCA\_003552885.1:0.0403182)'1.0:g\_\_Tc-Br11-E2g8':0.0864549,GB\_GCA\_001564255.1:0.0813246)0.938:0.020788)0.765:0.0169601,RS\_GCF\_003344565.1:0.124149)1.0:0.0733141,(RS\_GCF\_011440375.1:0.13785,RS\_GCF\_900103505.1:0.103886)1.0:0.0583826)'0.995:f\_\_Natrialbaceae':0.0209178,((((GB\_GCA\_003023565.1:0.0445856,RS\_GCF\_003675875.1:0.0180898)1.0:0.0272938,RS\_GCF\_005954745.1:0.0576589)0.924:0.0140696,(RS\_GCF\_003675855.1:0.0253256,RS\_GCF\_004785955.1:0.0237818)1.0:0.0340731)'1.0:f\_\_QS-9-68-17:g\_\_Halostella':0.0600185,RS\_GCF\_900215575.1:0.119987)1.0:0.0285686,((GB\_GCA\_003022865.1:0.191372,GB\_GCA\_003023195.1:0.130191)'1.0:f\_\_SW-7-71-33:g\_\_SW-7-71-33':0.0767867,RS\_GCF\_000403645.1:0.184923)0.997:0.0382392)0.626:0.0188546)0.96:0.020137)0.231:0.0126592,((((((((RS\_GCF\_003369835.1:0.0502813,RS\_GCF\_010747475.1:0.0423893)0.361:0.013298,RS\_GCF\_005239435.1:0.0359223)0.949:0.00947041,(RS\_GCF\_004087835.1:0.03795,RS\_GCF\_004765815.2:0.041141)1.0:0.0206503)0.812:0.00976049,RS\_GCF\_004765785.1:0.0446243)1.0:0.02283,(RS\_GCF\_003382685.1:0.0506666,RS\_GCF\_004765805.1:0.070997)1.0:0.0413979,GB\_GCA\_003023465.1:0.0556264)0.981:0.0134775)1.0:0.0175804,RS\_GCF\_004765795.1:0.065612)0.554:0.0136421,RS\_GCF\_004143485.2:0.0688324)0.887:0.0174995,RS\_GCF\_008831545.1:0.0815677)'1.0:g\_\_Halorusus':0.040353,((RS\_GCF\_000376445.1:0.0365736,RS\_GCF\_001625445.1:0.0340356)1.0:0.0351197,(RS\_GCF\_000710615.1:0.0148437,RS\_GCF\_900156425.1:0.00794619)1.0:0.0521387)1.0:0.0566735,RS\_GCF\_003298465.1:0.0842819)'1.0:g\_\_Haladaptatus':0.035857)'1.0:f\_\_Haladaptataceae':0.0643142)0.988:0.0177554,((((((((((((RS\_GCF\_000336895.1:0.00520632,RS\_GCF\_012726115.1:0.00532613)1.0:0.004872,RS\_GCF\_000336635.1:0.0122842)0.82:0.00152941,(RS\_GCF\_000011085.1:0.00936776,RS\_GCF\_001485575.1:0.00763731)0.993:0.00373185)0.993:0.00416684,(RS\_GCF\_000223905.1:0.00466889,RS\_GCF\_000336615.1:0.00723507)0.998:0.00534418)0.794:0.0022858,RS\_GCF\_008729015.1:0.0127422)0.925:0.0024898,((RS\_GCF\_001280425.1:0.00793828,RS\_GCF\_002844335.1:0.00971106)1.0:0.00631017,RS\_GCF\_000337775.1:0.0162766)0.0:0.00207235)0.998:0.00731943,RS\_GCF\_005406125.1:0.0132562)1.0:0.0265708,RS\_GCF\_010119195.1:0.0358247)'1.0:g\_\_Haloarcula':0.0292224,((RS\_GCF\_004681185.1:0.0140246,RS\_GCF\_010119205.1:0.0183956)1.0:0.0428691,GB\_GCA\_014647235.1:0.040767)0.523:0.0119754,(GB\_GCA\_003020925.1:0.0459668,GB\_GCA\_003021755.1:0.0425255)1.0:0.04881)'1.0:g\_\_Halomicroarcula':0.0224343)1.0:0.0542245,(((RS\_GCF\_000023965.1:0.00318815,RS\_GCF\_000379085.1:0.00599233)0.999:0.00786636,RS\_GCF\_009617995.1:0.00571193)1.0:0.0494052,GB\_GCA\_003021685.1:0.0776956)1.0:0.0474355,RS\_GCF\_900114435.1:0.107347)'0.905:g

\_\_Halomicrobium':0.0275402)1.0:0.0413381,((((RS\_GCF\_013415885.1:0.0205335,RS\_GCF\_013415905.1:0.0129251)0.122:0.00575934,RS\_GCF\_000337455.1:0.0187363)1.0:0.0188152,RS\_GCF\_004698125.1:0.0229629)0.997:0.0187171,(GB\_GCA\_003023165.1:0.0631699,RS\_GCF\_003730195.1:0.0466236)0.959:0.0148971)'1.0:g\_\_Halosimplex':0.0507273,((GB\_GCA\_003021305.1:0.0818896,GB\_GCA\_003021655.1:0.0859808)0.867:0.0196186,GB\_GCA\_003023785.1:0.0966076)0.999:0.0252327)1.0:0.0591436)0.219:0.017484,((((RS\_GCF\_004944975.1:0.0388976,RS\_GCF\_900880625.1:0.0391593)1.0:0.026718,(RS\_GCF\_009690625.1:0.030466,RS\_GCF\_013839425.1:0.0267496)1.0:0.0565017)0.903:0.0211509,(RS\_GCF\_000023945.1:0.0278393,RS\_GCF\_000470655.1:0.0405135)1.0:0.0431601)'1.0:g\_\_Halorhabdus':0.0659474,RS\_GCF\_003058365.1:0.224848)0.997:0.0317658,(RS\_GCF\_004799665.1:0.0815679,RS\_GCF\_009741825.1:0.0966793)'1.0:g\_\_Halapricum':0.0641835)0.742:0.0322503)0.626:0.0192718,(((((((GB\_GCA\_003021015.1:0.00825196,GB\_GCA\_003022845.1:0.0183084)1.0:0.0306117,GB\_GCA\_003022725.1:0.0370629)0.922:0.0217662,GB\_GCA\_003022085.1:0.0551712)1.0:0.058724,GB\_GCA\_003021335.1:0.225394)0.891:0.0187618,((GB\_GCA\_003551265.1:0.116092,RS\_GCF\_900100385.1:0.100846)1.0:0.0334888,GB\_GCA\_003021285.1:0.110658)1.0:0.0329492)0.415:0.0128794,(RS\_GCF\_004015825.1:0.0829291,RS\_GCF\_009831575.1:0.085705)1.0:0.0522424)1.0:0.0183984,((GB\_GCA\_001564135.1:0.0312329,GB\_GCA\_003551945.1:0.0408838)1.0:0.110263,GB\_GCA\_000416085.1:0.181064)1.0:0.0310466)'1.0:g\_\_Halovenus':0.0397808,((GB\_GCA\_003022745.1:0.0700449,GB\_GCA\_003023485.1:0.0624291)1.0:0.0709145,RS\_GCF\_009831455.1:0.113164)0.91:0.026306,RS\_GCF\_009789175.1:0.110174)0.996:0.0191948)1.0:0.036998)1.0:0.0233939,((((RS\_GCF\_004118325.1:0.0263723,RS\_GCF\_900102305.1:0.0198761)0.247:0.00628376,RS\_GCF\_900110215.1:0.0178548)0.996:0.0106887,RS\_GCF\_001989615.1:0.0256011)1.0:0.0582298,RS\_GCF\_005049285.1:0.0834899)'1.0:g\_\_Halorientalis':0.066148)0.907:0.017959,GB\_GCA\_003021105.1:0.142761)1.0:0.0190576,((((((((GB\_GCA\_003022945.1:0.0177951,GB\_GCA\_003023535.1:0.0192472)0.64:0.00463854,GB\_GCA\_003020965.1:0.0101941)1.0:0.0542776,(GB\_GCA\_003022815.1:0.0128007,GB\_GCA\_003022905.1:0.0096859)1.0:0.0679936)0.905:0.0191754,((GB\_GCA\_003021005.1:0.0266572,GB\_GCA\_003021745.1:0.0140574)1.0:0.0872072,GB\_GCA\_003021325.1:0.0481903)0.136:0.0117808)1.0:0.0549906,((((RS\_GCF\_000591055.1:0.0571618,RS\_GCF\_013839515.1:0.0450724)1.0:0.0269143,RS\_GCF\_005239135.1:0.0636308)0.908:0.0169871,GB\_GCA\_007121575.1:0.0966452)1.0:0.0236006,RS\_GCF\_000026045.1:0.0880259)1.0:0.0250713)0.385:0.00820041,((RS\_GCF\_009741925.1:0.00549393,RS\_GCF\_013391635.1:0.00755028)1.0:0.0606812,(RS\_GCF\_013391085.1:0.0856476,RS\_GCF\_013391105.1:0.0684726)0.0:0.015115)0.997:0.015858)0.993:0.0135126,GB\_GCA\_007135435.1:0.10497)0.641:0.0189532,GB\_GCA\_007122455.1:0.115276)'1.0:g\_\_Natronomonas':0.0555331,((((RS\_GCF\_001950595.1:0.0124253,RS\_GCF\_009184545.1:0.0194242)1.0:0.0230707,GB\_GCA\_003021785.1:0.0680484)1.0:0.0875467,(GB\_GCA\_003021175.1:0.0156704,GB\_GCA\_003023185.1:0.0182495)1.0:0.073015)'1.0:g\_\_CBA1134':0.0858704,((GB\_GCA\_003020985.1:0.0534155,RS\_GCF\_007421925.1:0.0675259)'1.0:g\_\_QS-4-70-19':0.0850517,GB\_GCA\_003022005.1:0.140837)0.94:0.0310691)0.99:0.0245989)1.0:0.0309066,((GB\_GCA\_003021975.1:0.0960666,RS\_GCF\_009791395.1:0.126927)1.0:0.0404336,RS\_GCF\_003862495.1:0.185822)'1.0:g\_\_Halomarina':0.0474275)0.995:0.0241801)'0.998:f\_\_Haloarculaceae':0.0225983,((((RS\_GCF\_000336695.1:0.016162,RS\_GCF\_000336715.1:0.0138991)1.0:0.0308894,RS\_GCF\_000755245.1:0.0409758)1.0:0.0494683,(RS\_GCF\_000336675.1:0.0165216,RS\_GCF\_009900715.1:0.0177048)1.0:0.0931924)1.0:0.0292042,((RS\_GCF\_000334895.1:0.0166995,GB\_GCA\_003022685.1:0.0446015)0.523:0.0100366,(RS\_GCF\_000336915.1:0.0244747,RS\_GCF\_000336935.1:0.0260934)0.968:0.0106305)1.0:0.0664785)1.0:0.0495939,GB\_GCA\_003021045.1:0.143008)1.0:0.0389294,((GB\_GCA\_003021235.1:0.0659186,GB\_GCA\_003022925.1:0.0876602)0.694:0.0195886,(GB\_GCA\_003021705.1:0.0401996,GB\_GCA\_003021725.1:0.0364352)1.0:0.0536682)1.0:0.128865)'1.0:f\_\_Halococcaceae:g\_\_Halococcus':0.0582152)0.987:0.0199692)0.445:0.0146421,((((((((RS\_GCF\_001485535.1:0.0263203,RS\_GCF\_001488575.1:0.0159619)0.869:0.00636094,RS\_GCF\_009741975.1:0.029513)0.985:0.010658,RS\_GCF\_0011734195.1:0.0304696)1.0:0.0253798,RS\_GCF\_009831555.1:0.0597325)1.0:0.0278176,RS\_GCF\_00

0230955.2:0.0717055)0.878:0.017111,(RS\_GCF\_008124605.1:0.0984879,RS\_GCF\_900110535.1:0.0357435)1.0:0.0597556)'1.0:g\_\_Halobacterium':0.0709228,((((GB\_GCA\_014647115.1:0.0144043,GB\_GCA\_014647155.1:0.0328585)0.998:0.0148485,RS\_GCF\_000474235.1:0.0425558)1.0:0.0345124,GB\_GCA\_014647455.1:0.0463909)'1.0:g\_\_Halarchaeum':0.0829345,(RS\_GCF\_007833275.1:0.119652,GB\_GCA\_014647475.1:0.134683)0.986:0.0311992)1.0:0.027607)1.0:0.0351795,(RS\_GCF\_001011115.1:0.138929,RS\_GCF\_001886955.1:0.179794)1.0:0.0571304)'1.0:f\_\_Halobacteriaceae':0.0495244,(GB\_GCA\_003021085.1:0.155167,GB\_GCA\_007122875.1:0.212931)0.991:0.0359959)0.804:0.0172981)0.986:0.0284181,(((RS\_GCF\_000196895.1:0.0400882,RS\_GCF\_003697815.1:0.0506693)0.509:0.0151786,RS\_GCF\_001593955.1:0.0315431)'1.0:g\_\_Halalkalicoccus':0.10453,(GB\_GCA\_007128515.1:0.0332508,GB\_GCA\_007129135.1:0.0299148)'1.0:g\_\_SKXI01':0.124227)'1.0:f\_\_Halalkalicoccaceae':0.0492637)1.0:0.044564,((GB\_GCA\_007118075.1:0.176734,GB\_GCA\_007118145.1:0.166661)'1.0:f\_\_SKSH01;g\_\_SKSH01':0.164292,(GB\_GCA\_007118975.1:0.190438,GB\_GCA\_007123105.1:0.179242)'1.0:f\_\_SKNY01;g\_\_SKNY01':0.0940959)0.0:0.032517)1.0:0.113006,((GB\_GCA\_002503845.1:0.0509931,GB\_GCA\_009889685.1:0.068509)1.0:0.0373817,GB\_GCA\_009889625.1:0.0854399)'1.0:f\_\_UBA12382;g\_\_UBA12382':0.309842)'1.0:c\_\_Halobacteria;o\_\_Halobacteriales':0.322155,((((((((((((((GB\_GCA\_002839605.1:0.0188047,GB\_GCA\_013331015.1:0.0243721)1.0:0.0306115,GB\_GCA\_002508495.1:0.0727047)0.996:0.0187649,GB\_GCA\_012798365.1:0.0585163)1.0:0.026893,(RS\_GCF\_000327485.1:0.0205718,GB\_GCA\_002835825.1:0.0300133)1.0:0.0729069)0.998:0.0209046,(((GB\_GCA\_002502245.1:0.0417964,GB\_GCA\_003157895.1:0.0413776)0.817:0.0107896,GB\_GCA\_002497485.1:0.0561298)0.908:0.013474,GB\_GCA\_002067035.1:0.0667701)1.0:0.0283467)1.0:0.0274372,(GB\_GCA\_002839675.1:0.0303724,GB\_GCA\_903832665.1:0.0411865)1.0:0.0701117)0.473:0.0149794,(((GB\_GCA\_002495065.1:0.0612975,GB\_GCA\_003154335.1:0.0785929)0.425:0.0132463,GB\_GCA\_002495055.1:0.0595092)0.236:0.00942474,GB\_GCA\_003141335.1:0.0478367)1.0:0.0430278)1.0:0.0325407,(((RS\_GCF\_000017625.1:0.058434,GB\_GCA\_002502735.1:0.0588348)0.951:0.0171407,GB\_GCA\_003170075.1:0.0586127)1.0:0.0580206,GB\_GCA\_003136075.1:0.0956136)1.0:0.038382)'1.0:g\_\_Methanoregula':0.0385914,(GB\_GCA\_002067895.1:0.121022,GB\_GCA\_903900025.1:0.099574)'1.0:g\_\_MVRE01':0.0392511)1.0:0.106529,((((((((GB\_GCA\_002067095.1:0.0194965,GB\_GCA\_002501965.1:0.0231628)0.0:0.00543169,GB\_GCA\_002067155.1:0.0204641)1.0:0.0232184,GB\_GCA\_013331225.1:0.043074)1.0:0.0376929,((GB\_GCA\_002067485.1:0.0072674,GB\_GCA\_002067685.1:0.00960318)1.0:0.0374616,GB\_GCA\_002506105.1:0.0578587)1.0:0.0515737)0.999:0.0411111,GB\_GCA\_000235685.2:0.140388)1.0:0.0400209,GB\_GCA\_002509495.1:0.113406)'1.0:g\_\_Methanolinea':0.0570146,(((GB\_GCA\_002068435.1:0.0116232,GB\_GCA\_012516785.1:0.0259134)1.0:0.0812402,GB\_GCA\_013331415.1:0.100207)1.0:0.0447516,((GB\_GCA\_002499905.1:0.0342934,GB\_GCA\_013415575.1:0.0362279)0.998:0.0190414,GB\_GCA\_013415565.1:0.0400418)1.0:0.07667)'1.0:g\_\_UBA9949':0.0657571)0.993:0.0227428,((GB\_GCA\_001412335.1:0.0207052,GB\_GCA\_002509485.1:0.0163855)'1.0:g\_\_SD8':0.12803,GB\_GCA\_002503825.1:0.141542)0.824:0.0289301)1.0:0.0447106,(GB\_GCA\_903819595.1:0.0442317,GB\_GCA\_903828975.1:0.0363318)'1.0:g\_\_CAIKOD01':0.161537)1.0:0.0383037)'0.974:f\_\_Methanoregulaceae':0.0272722,((((RS\_GCF\_000013445.1:0.0248297,GB\_GCA\_012520015.1:0.0792362)0.999:0.0189318,GB\_GCA\_012729995.1:0.0468929)0.043:0.018632,(RS\_GCF\_003173335.1:0.0450061,GB\_GCA\_012729535.1:0.0666545)1.0:0.0244551)1.0:0.111763,(RS\_GCF\_003173355.1:0.036325,GB\_GCA\_003251955.1:0.0269527)1.0:0.115149)'1.0:g\_\_Methanospirillum':0.0816886,GB\_GCA\_009779205.1:0.279802)1.0:0.108519,GB\_GCA\_903926075.1:0.299692)'1.0:f\_\_Methanospirillaceae':0.0478177)1.0:0.0291019,(((GB\_GCA\_002495225.1:0.0424669,GB\_GCA\_013331215.1:0.040578)1.0:0.0298919,GB\_GCA\_012728895.1:0.099352)0.349:0.0318308,GB\_GCA\_004332335.1:0.0746054)'1.0:g\_\_UBA288':0.156898,RS\_GCF\_000021965.1:0.172367)'1.0:f\_\_Methanosphaerulaceae':0.0788882)1.0:0.0316909,((((RS\_GCF\_000015765.1:0.0131876,GB\_GCA\_003315675.1:0.0171516)0.983:0.00502658,GB\_GCA\_002498375.1:0.00936922)1.0:0.0165756,RS\_GCF\_002287215.1:0.0224602)1.0:0.0306643,GB\_GCA\_002506085.1:0.0652055)1.0:0.0698693,GB\_GCA\_001940805.1:0.0735366)'1.0:g\_\_Methanocorpusculum':0.207529,((GB\_GCA\_002496395.1

:0.0276559,GB\_GCA\_013329165.1:0.0336518)1.0:0.0650684,(GB\_GCA\_003838065.1:0.0938902,GB\_GCA\_003838185.1:0.106003)0.991:0.0294489)1.0:0.0438286,GB\_GCA\_007130455.1:0.107793)'1.0:g\_\_Methanocalculus':0.121766)'1.0:f\_\_Methanocorpusculaceae':0.0899506,(((RS\_GCF\_000275865.1:0.00817674,RS\_GCF\_013377755.1:0.0100122)1.0:0.0728691,(RS\_GCF\_001571385.1:0.0113433,GB\_GCA\_002498315.1:0.00852649)1.0:0.10956)0.505:0.0227445,RS\_GCF\_004297185.1:0.0990446)'1.0:f\_\_Methanofollaceae;g\_\_Methanofollis':0.150185)0.99:0.0319917)0.991:0.0251544,((((((((((((RS\_GCF\_000015825.1:0.0174452,RS\_GCF\_000691865.1:0.0140722)0.999:0.0084702,(RS\_GCF\_001017125.1:0.0176935,RS\_GCF\_001602375.1:0.029328)0.985:0.0078956)0.751:0.00436059,((GB\_GCA\_001315965.1:0.029441,RS\_GCF\_900095385.1:0.0145629)0.999:0.0109534,GB\_GCA\_012511245.1:0.0674982)0.494:0.00970493)1.0:0.0185939,(GB\_GCA\_002498065.1:0.0247973,GB\_GCA\_002839575.1:0.042193)0.867:0.00936961)1.0:0.0181417,(GB\_GCA\_002503885.1:0.0104864,GB\_GCA\_002839645.1:0.012625)1.0:0.0417882)1.0:0.0108285,(GB\_GCA\_002499455.1:0.0599194,GB\_GCA\_002506585.1:0.0476254)0.981:0.0122695)0.944:0.00855168,GB\_GCA\_002508705.1:0.0600448)0.71:0.00883706,(GB\_GCA\_001896715.1:0.0643833,GB\_GCA\_002501655.1:0.0438046)0.976:0.0142067)0.652:0.0102249,(((GB\_GCA\_012510295.1:0.0191593,GB\_GCA\_012521035.1:0.0213116)1.0:0.0337997,GB\_GCA\_012510335.1:0.0601985)0.996:0.0182301,(GB\_GCA\_001512375.1:0.049692,GB\_GCA\_012797575.1:0.0648782)1.0:0.0201076)0.93:0.0125885,RS\_GCF\_000304355.2:0.0242786)1.0:0.0413763)0.952:0.0164677,RS\_GCF\_001571405.1:0.0676549)1.0:0.0264171,GB\_GCA\_002497965.1:0.104965)'1.0:g\_\_Methanoculleus':0.0633026,(GB\_GCA\_002503105.1:0.114853,RS\_GCF\_004102725.1:0.121897)0.505:0.0257618)1.0:0.0608187,GB\_GCA\_002503135.1:0.219956)'1.0:f\_\_Methanoculleaceae':0.0431248)0.933:0.0273481,(((RS\_GCF\_000147875.1:0.00844538,RS\_GCF\_000784355.1:0.00647498)'1.0:g\_\_Methanolacina':0.130992,RS\_GCF\_000243255.1:0.176862)0.576:0.0299498,RS\_GCF\_000711215.1:0.202487)1.0:0.079078,(((RS\_GCF\_001315945.1:0.0404425,RS\_GCF\_009914725.1:0.0201811)1.0:0.0362322,GB\_GCA\_012523385.1:0.08853)1.0:0.103961,GB\_GCA\_011045995.1:0.150496)'1.0:g\_\_Methanogenium':0.0754607)1.0:0.0618843,((GB\_GCA\_001412355.1:0.0997286,GB\_GCA\_013415665.1:0.0862388)'1.0:g\_\_LKUD01':0.0796084,GB\_GCA\_011048835.1:0.171556)0.966:0.0327977)'0.999:f\_\_Methanomicrobiaceae':0.0379516)'1.0:c\_\_Methanomicrobia;o\_\_Methanomicrobiales':0.297712)0.975:0.048582,(((GB\_GCA\_003139855.1:0.00438252,GB\_GCA\_003158275.1:0.00326531)1.0:0.0351743,GB\_GCA\_003162175.1:0.036974)1.0:0.0667672,GB\_GCA\_003170935.1:0.101111)'1.0:c\_\_Bog-38;o\_\_Bog-38;f\_\_Bog-38;g\_\_Bog-38':0.364559)1.0:0.0472208,((((((((((((RS\_GCF\_000504205.1:0.0251082,RS\_GCF\_006546655.1:0.0180278)0.583:0.00774592,RS\_GCF\_900100715.1:0.0132918)1.0:0.0419287,RS\_GCF\_900114835.1:0.0449738)1.0:0.0181932,(RS\_GCF\_002243045.1:0.0517842,GB\_GCA\_002507205.1:0.041706)0.923:0.0143282)0.966:0.0165825,GB\_GCA\_003565715.1:0.109311)1.0:0.0534273,(((GB\_GCA\_002508635.1:0.00994431,RS\_GCF\_013388255.1:0.00357187)1.0:0.0493675,RS\_GCF\_004745425.1:0.0518814)1.0:0.0435148,(GB\_GCA\_000306725.1:0.0394561,GB\_GCA\_002501695.1:0.0373623)1.0:0.0619929)1.0:0.0344768)'1.0:g\_\_Methanolobus':0.0613878,(((GB\_GCA\_001896725.1:0.0533307,GB\_GCA\_002067275.1:0.0197276)0.901:0.00926906,RS\_GCF\_000328665.1:0.0429821)0.995:0.00968247,(GB\_GCA\_002067265.1:0.0255638,GB\_GCA\_002508425.1:0.0183846)1.0:0.0198293)1.0:0.0287231,GB\_GCA\_014361205.1:0.0651792)'1.0:g\_\_Methanomethylovorans':0.129277)1.0:0.0363401,(((RS\_GCF\_000025865.1:0.0225267,RS\_GCF\_001889405.1:0.0131634)0.995:0.00410927,(RS\_GCF\_002761295.1:0.00902637,RS\_GCF\_900215215.1:0.0157714)0.713:0.0015935)0.903:0.00247994,RS\_GCF\_004137855.1:0.0125716)0.877:0.00569043,RS\_GCF\_003722075.1:0.0107015)'1.0:g\_\_Methanohalophilus':0.211416,(((RS\_GCF\_000765475.1:0.0142922,RS\_GCF\_900774055.1:0.0130194)0.911:0.00603204,RS\_GCF\_900111645.1:0.0129704)1.0:0.0227932,RS\_GCF\_000970325.1:0.0376659)1.0:0.0345107,RS\_GCF\_000013725.1:0.0823104)'1.0:g\_\_Methanococoides':0.0860013)1.0:0.0370851)0.999:0.0274772,(((RS\_GCF\_000217995.1:0.0191351,GB\_GCA\_007127385.1:0.0213148)1.0:0.0803479,GB\_GCA\_003555325.1:0.172125)'1.0:g\_\_Methanosalsum':0.103661,RS\_GCF\_000196655.1:0.228452)0.997:0.0360049)1.0:0.03

74949,((((((((((RS\_GCF\_000195895.1:0.0168197,RS\_GCF\_000970025.1:0.0126657)1.0:0.00923354,RS\_GCF\_000969905.1:0.0164425)0.999:0.0100819,GB\_GCA\_002505485.1:0.0227751)0.303:0.00531428,((RS\_GCF\_000970305.1:0.00491895,GB\_GCA\_013331275.1:0.00830992)0.645:0.00433488,RS\_GCF\_002287235.1:0.0111229)1.0:0.0146545)1.0:0.0112229,GB\_GCA\_002496565.1:0.0268227)1.0:0.0131496,(GB\_GCA\_002499445.1:0.0179221,GB\_GCA\_002509325.1:0.017646)1.0:0.035105)0.811:0.00495212,((RS\_GCF\_000969885.1:0.0277508,RS\_GCF\_001304615.2:0.0159017)1.0:0.0272803,RS\_GCF\_004099695.1:0.0298462)0.989:0.00833093)1.0:0.0212801,((GB\_GCA\_003157235.1:0.020017,GB\_GCA\_003164755.1:0.0226333)1.0:0.069281,GB\_GCA\_001714685.2:0.0351635)1.0:0.021841)1.0:0.0173097,(((RS\_GCF\_000970265.1:0.026587,RS\_GCF\_000979455.1:0.0188157)1.0:0.0116785,RS\_GCF\_000969965.1:0.0257038)1.0:0.0189083,(RS\_GCF\_000007345.1:0.0175025,RS\_GCF\_000970085.1:0.0184298)1.0:0.0205774)0.436:0.00798629,(((RS\_GCF\_000970285.1:0.0144809,GB\_GCA\_013330315.1:0.0273201)0.334:0.00670409,RS\_GCF\_000970205.1:0.0354619)0.91:0.00547759,GB\_GCA\_013331265.1:0.0367179)0.998:0.0103073)1.0:0.0188984)'1.0:g\_\_Methanosarcina':0.0482774,(RS\_GCF\_000970045.1:0.0177044,GB\_GCA\_013329415.1:0.0130038)'1.0:g\_\_MTP4':0.0684108)1.0:0.110762,(((GB\_GCA\_009783635.1:0.049067,GB\_GCA\_009784005.1:0.0536123)1.0:0.0396212,RS\_GCF\_004363215.1:0.0586516)1.0:0.0413645,GB\_GCA\_009776675.1:0.103722)1.0:0.112564,GB\_GCA\_012518265.1:0.256739)'1.0:g\_\_Methanimicrococcus':0.149476)1.0:0.0670267)0.365:0.0290955,GB\_GCA\_012329085.1:0.338108)'1.0:f\_\_Methanosarcinaceae':0.0901125,((((((((RS\_GCF\_900196725.1:0.0234023,GB\_GCA\_902386135.1:0.0231226)1.0:0.0604161,RS\_GCF\_000685155.1:0.105573)0.928:0.0170057,((GB\_GCA\_012026835.1:0.0251075,GB\_GCA\_902386205.1:0.0205274)1.0:0.0635376,GB\_GCA\_902386115.1:0.123287)0.959:0.0143634)0.409:0.00795497,GB\_GCA\_902386085.1:0.109735)0.995:0.0184046,(((RS\_GCF\_002487355.1:0.0184325,GB\_GCA\_902384525.1:0.0108147)0.928:0.00560775,GB\_GCA\_012026795.1:0.0203246)1.0:0.0258271,GB\_GCA\_003104905.1:0.0538706)1.0:0.0662661,GB\_GCA\_902386255.1:0.0745645)1.0:0.0401147)'1.0:g\_\_Methanoperedens':0.0471815,GB\_GCA\_002839545.1:0.150169)1.0:0.109603,GB\_GCA\_013331375.1:0.278735)'1.0:f\_\_Methanoperedenaceae':0.0646476,(((GB\_GCA\_004193545.1:0.0149489,GB\_GCA\_004212095.1:0.0319521)0.741:0.0143164,GB\_GCA\_012910725.1:0.0256381)'1.0:g\_\_Ethanoperedens':0.174389,(GB\_GCA\_002254825.2:0.00211058,GB\_GCA\_002255135.1:5e-09)'1.0:g\_\_EX4572-44':0.198094)'1.0:f\_\_EX4572-44':0.166258)0.963:0.0361903,(((GB\_GCA\_009649835.1:0.00347343,GB\_GCA\_013374465.1:0.00358841)1.0:0.0154494,(GB\_GCA\_013330355.1:0.0387142,GB\_GCA\_014237145.1:0.0281802)0.0:0.00662936)'1.0:g\_\_UBA7939':0.0920551,GB\_GCA\_013374385.1:0.128046)1.0:0.0359749,GB\_GCA\_002926195.1:0.165398)'1.0:f\_\_HR1':0.168597)0.97:0.0400551)1.0:0.0475419,((((GB\_GCA\_003194445.1:0.0175237,GB\_GCA\_003661105.1:0.0226902)1.0:0.0222006,GB\_GCA\_013572355.1:0.0228545)0.78:0.011768,GB\_GCA\_002503595.1:0.0195349)1.0:0.0869472,GB\_GCA\_002506015.1:0.139284)0.805:0.0202779,GB\_GCA\_003601535.1:0.0982964)0.884:0.0262522,(GB\_GCA\_004211975.1:0.092623,GB\_GCA\_012961645.1:0.0591391)1.0:0.0668281)'1.0:f\_\_ANME-2c;g\_\_UBA203':0.261997)'0.844:o\_\_Methanosarcinales':0.0372495,((((((((GB\_GCA\_002067705.1:0.0556192,GB\_GCA\_011391755.1:0.04193)1.0:0.0320844,(GB\_GCA\_002256595.1:0.0300457,GB\_GCA\_002505805.1:0.0500789)1.0:0.0473834)1.0:0.0239729,((RS\_GCF\_000204415.1:0.00697554,GB\_GCA\_011620785.1:0.00965257)1.0:0.0820758,GB\_GCA\_903871465.1:0.0585461)1.0:0.020258)0.994:0.013437,GB\_GCA\_902385025.1:0.0677067)0.982:0.0168419,GB\_GCA\_003857025.1:0.0752599)0.771:0.0141172,(GB\_GCA\_002067755.1:0.0192371,GB\_GCA\_012798025.1:0.0171855)1.0:0.0574184)1.0:0.0273047,GB\_GCA\_002067365.1:0.0910775)'1.0:g\_\_Methanothrix':0.0388992,GB\_GCA\_013178225.1:0.125025)0.999:0.030634,(GB\_GCA\_002506335.1:0.175688,GB\_GCA\_003162615.1:0.102459)0.554:0.0237688)1.0:0.0598977,((RS\_GCF\_000014945.1:0.153863,GB\_GCA\_002067795.1:0.169825)1.0:0.0442739,GB\_GCA\_013415595.1:0.149271)1.0:0.0324992)1.0:0.0657782,(((RS\_GCF\_000235565.1:0.0405154,GB\_GCA\_001602645.1:0.0321311)1.0:0.0366283,GB\_GCA\_002506535.1:0.0720829)1.0:0.0194136,(GB\_GCA\_002502785.1:0.0308595,GB\_GCA\_013329455.1:0.0501724)1.0:0.0159844)0.0:0.008





51975,(GB\_GCA\_001629255.1:0.0203795,GB\_GCA\_902601345.1:0.0165245)0.991:0.00595404)0.408  
:0.000898647,GB\_GCA\_001629235.1:0.00765833)0.913:0.00404766,GB\_GCA\_902573015.1:0.01345  
51)0.907:0.0063084,GB\_GCA\_902573085.1:0.0359306)0.999:0.0181972,GB\_GCA\_002697065.1:0.03  
5329)1.0:0.0502846,((((GB\_GCA\_002723045.1:0.0288256,GB\_GCA\_002730445.1:0.0273731)0.0:0.0  
0590663,GB\_GCA\_003602515.1:0.0382077)0.996:0.0141108,GB\_GCA\_002457155.1:0.0298823)0.36  
8:0.00892884,GB\_GCA\_002683155.1:0.0726521)1.0:0.0226726,(GB\_GCA\_004195615.1:0.0308037,G  
B\_GCA\_014239955.1:0.0263549)1.0:0.0383012)1.0:0.0372256)1.0:0.0396552,GB\_GCA\_002718695.1  
:0.113068)0.786:0.0132174,(((GB\_GCA\_002172185.1:0.0285477,GB\_GCA\_002720055.1:0.0333807)0  
.983:0.0162013,GB\_GCA\_002713185.1:0.0302613)1.0:0.092289,(GB\_GCA\_002506755.1:0.0265515,  
GB\_GCA\_902573115.1:0.0184696)1.0:0.10545)0.987:0.0257419)0.381:0.013373,GB\_GCA\_00271608  
5.1:0.106845)1.0:0.0330628,GB\_GCA\_002725315.1:0.109833)0.946:0.0231804,GB\_GCA\_002728565.  
1:0.172887)0.95:0.0266304,GB\_GCA\_002722735.1:0.143135)0.886:0.0285989,(GB\_GCA\_001629205.  
1:0.0387573,GB\_GCA\_002496485.1:0.0376869)1.0:0.16573)1.0:0.0740852,((((GB\_GCA\_002712575.  
1:0.0123453,GB\_GCA\_002719615.1:0.0214622)0.999:0.0091236,GB\_GCA\_003602595.1:0.0228199)0  
.999:0.0123727,GB\_GCA\_002172375.1:0.0240142)1.0:0.0287124,GB\_GCA\_002731195.1:0.0425028)  
0.997:0.0236284,GB\_GCA\_002457145.1:0.0576836)1.0:0.0595583,GB\_GCA\_002503285.1:0.110517)  
1.0:0.13887)'1.0:g\_\_MGIIb-  
O3':0.0446546,((((GB\_GCA\_002499325.1:0.0212397,GB\_GCA\_002499865.1:0.0169053)0.0:0.0015  
4507,(GB\_GCA\_002501805.1:0.0116289,GB\_GCA\_002502095.1:0.0125696)0.189:0.00141024)1.0:0.0  
237894,(GB\_GCA\_002499345.1:0.0255085,GB\_GCA\_002506825.1:0.0145882)1.0:0.0272668)1.0:0.04  
06066,GB\_GCA\_002496725.1:0.0708482)0.902:0.0197467,(GB\_GCA\_002501605.1:0.0168588,GB\_G  
CA\_002505775.1:0.0128702)1.0:0.0416674,GB\_GCA\_002730095.1:0.0398221)1.0:0.0389433)1.0:0.0  
7404,(((GB\_GCA\_002497985.1:0.00628572,GB\_GCA\_002719635.1:0.0106556)0.991:0.00874032,GB\_  
GCA\_002726275.1:0.0157855)1.0:0.0401666,(GB\_GCA\_002498925.1:0.0330413,GB\_GCA\_00271899  
5.2:0.0220143)1.0:0.0324471,GB\_GCA\_002504435.1:0.0401572)1.0:0.0242587)1.0:0.0642022)'1.0:g  
\_\_MGIIb-  
O5':0.102471,((((GB\_GCA\_002457605.1:0.0192242,GB\_GCA\_002505325.1:0.0122833)1.0:0.017934,  
(GB\_GCA\_002495735.1:0.0189674,GB\_GCA\_004195715.1:0.017981)1.0:0.0171025)1.0:0.0184705,G  
B\_GCA\_014240285.1:0.04011)1.0:0.0452643,(((GB\_GCA\_002501885.1:0.0172534,GB\_GCA\_002503  
055.1:0.0291793)1.0:0.0297261,GB\_GCA\_002727275.1:0.0458974)0.979:0.0114722,GB\_GCA\_00271  
4745.1:0.04461)0.336:0.0116501,GB\_GCA\_002698225.1:0.0546284)1.0:0.0930849)0.919:0.0352982,  
(GB\_GCA\_002507125.1:0.0657138,GB\_GCA\_003193925.1:0.0656939)1.0:0.0402724)'1.0:g\_\_Thalass  
archaeum':0.084574)0.885:0.0233462)0.997:0.0233782,((((GB\_GCA\_002498985.1:0.00535827,GB  
\_GCA\_002730775.1:0.0214672)0.574:0.00152655,GB\_GCA\_002685315.1:0.00634558)1.0:0.0134167  
,GB\_GCA\_002495525.1:0.0279697)1.0:0.0187926,(GB\_GCA\_002497245.1:0.0220356,GB\_GCA\_9025  
93945.1:0.018084)1.0:0.016227,GB\_GCA\_002504905.1:0.0373814)0.852:0.00798499)0.994:0.01492  
36,GB\_GCA\_002686525.1:0.0530044)1.0:0.0406288,((GB\_GCA\_002494975.1:0.0140479,GB\_GCA\_90  
2511005.1:0.0192505)0.666:0.00971556,GB\_GCA\_902514485.1:0.0184079)1.0:0.0484782)1.0:0.102  
537,(GB\_GCA\_002499785.1:0.0270225,GB\_GCA\_012960975.1:0.0341156)1.0:0.112941)'1.0:g\_\_MGII  
b-  
O2':0.0568129)1.0:0.0394943,((((GB\_GCA\_002497025.1:0.00487941,GB\_GCA\_902560445.1:0.018  
7981)0.994:0.00882062,GB\_GCA\_002457555.1:0.0232008)1.0:0.0230174,((GB\_GCA\_002496905.1:0.  
0235007,GB\_GCA\_002502175.1:0.0122212)0.97:0.00514385,GB\_GCA\_002685415.1:0.0242459)0.99  
9:0.0130463)0.998:0.0152198,(GB\_GCA\_002502365.1:0.00868724,GB\_GCA\_002708385.1:0.0239327  
)1.0:0.046826)1.0:0.0519989,(GB\_GCA\_002497895.1:0.0148449,GB\_GCA\_013329905.1:0.0224294)1  
.0:0.0496935)1.0:0.0410359,((GB\_GCA\_002457595.1:0.045681,GB\_GCA\_013330385.1:0.0355869)1.  
0:0.0487808,GB\_GCA\_002498725.1:0.131211)0.774:0.0205439)1.0:0.0323659,GB\_GCA\_002498525.  
1:0.121817)'1.0:g\_\_MGIIb-

O1':0.080613)1.0:0.075821,((((GB\_GCA\_002170775.2:0.0276834,GB\_GCA\_002712645.1:0.0099083  
8)0.705:0.00501318,GB\_GCA\_002497295.1:0.022795)0.992:0.00653249,GB\_GCA\_002504845.1:0.01  
1895)0.693:0.00811713,GB\_GCA\_002717835.1:0.0436275)0.992:0.0158699,GB\_GCA\_002505455.1:0  
.0277382)1.0:0.0758291,(((GB\_GCA\_002505695.1:0.0148568,GB\_GCA\_002507175.1:0.0210146)0.9  
9:0.010347,GB\_GCA\_002495675.1:0.0256069)1.0:0.0524162,GB\_GCA\_011523055.1:0.0665239)1.0:0  
.06814,GB\_GCA\_002499585.1:0.124083)0.997:0.0352526)'1.0:g\_\_MGIIb-  
N1':0.202336)1.0:0.092646,((((GB\_GCA\_002502625.1:0.0220828,GB\_GCA\_002708015.1:0.011972  
3)0.879:0.00587013,GB\_GCA\_002702985.1:0.0184216)0.324:0.00469412,GB\_GCA\_002697105.1:0.0  
223968)1.0:0.0247896,GB\_GCA\_002708695.1:0.0493151)0.526:0.0138988,GB\_GCA\_002503045.1:0.  
0405999)1.0:0.041621,(GB\_GCA\_002503665.1:0.0154316,GB\_GCA\_002718215.1:0.0135973)1.0:0.06  
09224)1.0:0.0828575,(((GB\_GCA\_002497905.1:0.016199,GB\_GCA\_002506875.1:0.0100078)0.994:0.  
0121071,GB\_GCA\_002713585.1:0.0220828)1.0:0.0333888,GB\_GCA\_002712285.1:0.032889)1.0:0.12  
3102)'1.0:g\_\_MGIIb-  
N2':0.208435)1.0:0.0583574,((((GB\_GCA\_002685895.1:0.068611,GB\_GCA\_002725475.1:0.0773223)  
0.991:0.0256302,GB\_GCA\_002727675.1:0.111308)0.65:0.0274228,((GB\_GCA\_012959435.1:0.033527  
9,GB\_GCA\_012964335.1:0.0324651)0.385:0.0148823,GB\_GCA\_014384685.1:0.0326697)1.0:0.08922  
59)1.0:0.0881865,GB\_GCA\_002505495.1:0.163275)'1.0:g\_\_MGIIb-  
Q1':0.139017,((((GB\_GCA\_002498455.1:0.0151137,GB\_GCA\_002724815.1:0.0140771)1.0:0.020337  
2,GB\_GCA\_002701965.1:0.0283995)0.999:0.0250782,GB\_GCA\_002505685.1:0.0444011)1.0:0.04051  
8,GB\_GCA\_002457195.1:0.08657)0.985:0.0326603,GB\_GCA\_002722595.1:0.101532)'1.0:g\_\_MGIIb-  
P':0.166946)0.928:0.0433849)'1.0:f\_\_Thalassarchaeaceae':0.0681877,((((((((((((((((GB\_GCA\_0027210  
85.1:5e-  
09,GB\_GCA\_013329355.1:0.0010867)1.0:0.0127159,GB\_GCA\_013329865.1:0.00791115)1.0:0.02844  
18,GB\_GCA\_002506025.1:0.0294877)1.0:0.0208265,GB\_GCA\_002505355.1:0.0637332)0.981:0.0128  
976,GB\_GCA\_002496955.1:0.0772805)0.592:0.0115067,GB\_GCA\_013329295.1:0.0476424)0.186:0.0  
0819321,(GB\_GCA\_002495945.1:0.0533961,GB\_GCA\_011526375.1:0.0452957)0.456:0.00835795)1.0  
:0.0300197,(((GB\_GCA\_002726395.1:0.0172153,GB\_GCA\_009887195.1:0.0219938)0.992:0.0070514  
4,GB\_GCA\_002688825.1:0.0333021)0.833:0.00580382,GB\_GCA\_013329925.1:0.0140026)1.0:0.0625  
294)1.0:0.0686031,(((GB\_GCA\_002172355.2:0.011555,GB\_GCA\_002697705.1:0.0168059)0.961:0.01  
05145,GB\_GCA\_003602575.1:0.0249089)1.0:0.0492844,((GB\_GCA\_002702945.1:0.0321023,GB\_GCA  
\_002729095.1:0.039727)0.809:0.0091627,GB\_GCA\_002727485.1:0.0688341)1.0:0.0308975)1.0:0.05  
62304)1.0:0.0528613,((((GB\_GCA\_002499705.1:0.0109908,GB\_GCA\_902520595.1:0.0182509)0.989  
:0.00953168,GB\_GCA\_002170315.2:0.0233043)1.0:0.0268986,GB\_GCA\_009937025.1:0.0425292)1.0:  
0.0228241,((GB\_GCA\_002506275.1:0.0291766,GB\_GCA\_003602605.1:0.0266489)1.0:0.0215682,GB\_  
GCA\_002687075.1:0.0696828)1.0:0.0174048)1.0:0.0340514,GB\_GCA\_002499545.1:0.0769742)1.0:0.  
0390616,(((GB\_GCA\_000246735.1:0.0170994,GB\_GCA\_009887095.1:0.0145221)1.0:0.0239408,GB\_  
GCA\_013330285.1:0.0317721)0.989:0.0136669,((GB\_GCA\_002502605.1:0.011242,GB\_GCA\_0036026  
45.1:0.0148001)1.0:0.0275163,GB\_GCA\_002495535.1:0.0343344)0.986:0.0134388)0.871:0.0119855,  
GB\_GCA\_013329255.1:0.0560554)1.0:0.0489533)1.0:0.0501436)0.292:0.0195992,((GB\_GCA\_002499  
015.1:0.0311765,GB\_GCA\_009937205.1:0.0199515)1.0:0.0396553,GB\_GCA\_012959845.1:0.0385888  
)1.0:0.138413)'0.996:g\_\_MGIIa-  
L1':0.0288327,((((((((GB\_GCA\_002704515.1:0.0115905,GB\_GCA\_013330155.1:0.0104136)0.997:0.01  
11927,GB\_GCA\_002714305.1:0.0225163)0.999:0.0150365,GB\_GCA\_002502295.1:0.0368682)1.0:0.0  
320249,((GB\_GCA\_002694525.1:0.0332268,GB\_GCA\_002722695.1:0.0449969)1.0:0.0289038,GB\_GC  
A\_902625885.1:0.0826686)0.744:0.0111692)0.418:0.00843372,(GB\_GCA\_002497765.1:0.0378094,G  
B\_GCA\_002725275.1:0.0389805)1.0:0.0170137)0.973:0.0148115,(GB\_GCA\_002495645.1:0.0297156,  
GB\_GCA\_002689105.1:0.0277849)1.0:0.0275932)0.999:0.0242433,GB\_GCA\_002728035.1:0.0777529  
)1.0:0.0319297,((GB\_GCA\_002494645.1:0.0227906,GB\_GCA\_003602485.1:0.0299354)1.0:0.0660121

,(GB\_GCA\_002505405.1:0.0443528,GB\_GCA\_002726495.1:0.0526847)1.0:0.0693909)0.246:0.017993  
8)0.973:0.0227208,(GB\_GCA\_003602475.1:0.0703994,GB\_GCA\_011524855.1:0.0730076)1.0:0.06504  
22)'1.0:g\_\_Poseidonia':0.0953448)0.997:0.0393456,(((((((GB\_GCA\_002499195.1:0.0480919,GB\_GCA  
\_002706065.1:0.0443677)0.198:0.00715269,(GB\_GCA\_002502215.1:0.0167092,GB\_GCA\_002698145  
.1:0.0144743)1.0:0.0359713)0.998:0.0131831,((GB\_GCA\_002692685.1:0.0290252,GB\_GCA\_0122702  
65.1:0.00929631)0.889:0.00587828,GB\_GCA\_013330015.1:0.018871)1.0:0.0261946)0.0:0.00745992,  
GB\_GCA\_002719815.1:0.0443693)0.912:0.0118657,(GB\_GCA\_002722615.1:0.0233453,GB\_GCA\_013  
911465.1:0.0107203)1.0:0.0277628)0.904:0.017869,GB\_GCA\_002726845.1:0.0609961)1.0:0.050014  
4,((GB\_GCA\_002171315.2:0.0103974,GB\_GCA\_002496635.1:0.0110068)0.967:0.00936453,(GB\_GCA  
\_003602665.1:0.0138542,GB\_GCA\_009887135.1:0.0171687)0.998:0.0140461)1.0:0.0617576)'1.0:g\_  
\_MGIIa-  
L2':0.146355)0.941:0.0304301,(((((((GB\_GCA\_002496845.1:0.0070735,GB\_GCA\_002723635.1:0.0108  
405)1.0:0.0161236,GB\_GCA\_003602635.1:0.0150793)1.0:0.01924,((GB\_GCA\_002694585.1:0.009450  
18,GB\_GCA\_002722135.1:0.0104802)0.954:0.0093833,GB\_GCA\_002731395.1:0.0304789)1.0:0.0222  
957)0.999:0.0138271,GB\_GCA\_013330765.1:0.0433904)0.284:0.0095978,GB\_GCA\_013330925.1:0.0  
211636)'1.0:g\_\_MGIIa-L3':0.191478,(GB\_GCA\_002495405.1:0.00086064,GB\_GCA\_002718195.1:5e-  
09)'1.0:g\_\_MGIIa-  
L4':0.218916)1.0:0.0568042)1.0:0.0618887,(((((((((((GB\_GCA\_002498185.1:0.00713257,GB\_GCA\_002  
727695.1:0.0104223)0.997:0.00887558,(GB\_GCA\_002709705.1:0.0235343,GB\_GCA\_002710205.1:0.  
0209712)0.143:0.00484792)0.985:0.00793411,((GB\_GCA\_013330625.1:0.00805762,GB\_GCA\_90256  
3095.1:0.00317383)0.944:0.00298474,GB\_GCA\_002715725.1:0.0106403)1.0:0.0299529)1.0:0.01322  
37,((((GB\_GCA\_002506705.1:0.00837406,GB\_GCA\_011525095.1:0.0087056)1.0:0.0291667,GB\_GCA\_  
011522915.1:0.0300795)1.0:0.0165289,GB\_GCA\_002720115.1:0.0798971)0.265:0.00734115,GB\_GC  
A\_002689565.1:0.0470386)0.902:0.00633485)1.0:0.0260858,(((GB\_GCA\_002701145.1:0.00819029,G  
B\_GCA\_902605365.1:0.00766877)1.0:0.0622249,(GB\_GCA\_003602535.1:0.0352978,GB\_GCA\_00993  
6765.1:0.045785)1.0:0.0243432)1.0:0.019,(GB\_GCA\_002689345.1:0.0523949,GB\_GCA\_003602415.1:  
0.0446982)0.403:0.00930193)0.991:0.0147414)0.971:0.0169704,GB\_GCA\_002694245.1:0.0752529)0  
.221:0.0150396,(GB\_GCA\_002507425.1:0.0647944,GB\_GCA\_002710015.1:0.0416118)1.0:0.0646182)  
0.998:0.0282877,(GB\_GCA\_002707335.2:0.0124327,GB\_GCA\_002727515.1:0.00672469)1.0:0.12679  
4)0.991:0.0285971,(GB\_GCA\_002706615.1:0.111948,GB\_GCA\_004195515.1:0.135876)0.441:0.02484  
21)'1.0:g\_\_MGIIa-  
K1':0.0814883,(GB\_GCA\_002699425.1:0.0302303,GB\_GCA\_002719395.1:0.0236741)'1.0:g\_\_MGIIa-  
K2':0.253842)0.999:0.0468595)1.0:0.070649,(((GB\_GCA\_002505935.1:0.00995706,GB\_GCA\_002719  
475.1:0.014111)1.0:0.11925,(GB\_GCA\_012959275.1:0.026964,GB\_GCA\_014240385.1:0.0288256)1.0:  
0.12471)'1.0:g\_\_UBA226':0.131186,(GB\_GCA\_002503395.1:0.213125,GB\_GCA\_004195635.1:0.2032  
58)1.0:0.0624656)0.991:0.0429799)1.0:0.0580913,((((GB\_GCA\_002498205.1:0.031633,GB\_GCA\_002  
696315.1:0.0355354)0.997:0.0238855,(GB\_GCA\_002692465.1:0.014069,GB\_GCA\_002720275.1:0.01  
55913)1.0:0.0402858)1.0:0.0411447,GB\_GCA\_002699515.1:0.0888002)0.99:0.0347402,GB\_GCA\_002  
720095.2:0.100259)'1.0:g\_\_MGIIa-  
I':0.285772)'0.976:f\_\_Poseidoniaceae':0.046424)1.0:0.113882,GB\_GCA\_002715545.1:0.428696)'1.0:c  
\_\_Poseidoniia\_A;o\_\_Poseidoniales':0.250436,((RS\_GCF\_012044895.1:0.235728,GB\_GCA\_013041945  
.1:0.263265)'1.0:g\_\_JABDRC01':0.367313,GB\_GCA\_013288705.1:0.411515)'1.0:c\_\_JABDBI01;o\_\_JAB  
DBI01;f\_\_JABDBI01':0.628659)0.947:0.121151,(((((((GB\_GCA\_902531985.1:0.0373194,GB\_GCA\_9026  
27615.1:0.0406176)1.0:0.0363887,GB\_GCA\_902533295.1:0.0601448)1.0:0.0421621,(GB\_GCA\_01424  
0055.1:0.0434605,GB\_GCA\_014240255.1:0.0292903)1.0:0.0661757)0.64:0.0236281,GB\_GCA\_00250  
6485.1:0.113502)0.738:0.0286184,(((GB\_GCA\_001875345.1:0.022298,GB\_GCA\_001875365.1:0.034  
3205)0.963:0.0113957,GB\_GCA\_002724775.1:0.0404459)0.996:0.0168193,GB\_GCA\_002718915.1:0.  
044224)0.553:0.00831803,GB\_GCA\_002497685.1:0.040953)1.0:0.0923986)'1.0:g\_\_CG-

Epi1':0.173825,(((GB\_GCA\_002731655.1:0.0191572,GB\_GCA\_003193815.1:0.00949238)0.992:0.0151054,GB\_GCA\_002509165.1:0.0354269)1.0:0.0537924,(GB\_GCA\_002687355.1:0.0339542,GB\_GCA\_002731905.1:0.0290307)1.0:0.0558603)'1.0:g\_\_UBA8886':0.216545)1.0:0.0846971,(GB\_GCA\_001875425.1:0.0286046,GB\_GCA\_002509225.1:0.0381016)'1.0:g\_\_UBA102':0.298744)'1.0:c\_\_Poseidoniiia\_B;o\_\_MGIII;f\_\_CG-

Epi1':0.291604)1.0:0.0953987,(GB\_GCA\_002254385.1:0.424764,GB\_GCA\_002254765.1:0.400033)'0.999:c\_\_EX4484-6;o\_\_EX4484-6':0.12578)0.728:0.0419615,((((((((((((((((RS\_GCF\_001560915.1:0.0106456,RS\_GCF\_902787415.1:0.018838)1.0:0.0588306,RS\_GCF\_902763685.1:0.0546877)1.0:0.0854297,RS\_GCF\_000350305.1:0.15307)0.622:0.021035,((RS\_GCF\_000300255.2:0.0337907,GB\_GCA\_002503545.1:0.0490904)1.0:0.0429224,RS\_GCF\_001481295.1:0.14354)1.0:0.0372477)1.0:0.0395793,GB\_GCA\_002495325.1:0.140009)'1.0:g\_\_Methanomethylophilus':0.118506,(((GB\_GCA\_009776625.1:0.0874895,GB\_GCA\_009777615.1:0.035934)1.0:0.0437469,(GB\_GCA\_009778275.1:0.0579781,GB\_GCA\_009778575.1:0.0629559)0.352:0.0142351)0.58:0.0130705,GB\_GCA\_009786295.1:0.0831702)0.562:0.0163012,RS\_GCF\_000800805.1:0.0848246)'1.0:g\_\_Methanoplasma':0.0986955,(GB\_GCA\_002506905.1:0.0887294,GB\_GCA\_012719315.1:0.187605)'1.0:g\_\_UBA328':0.0470595)0.827:0.0222265)0.999:0.0277236,(((GB\_GCA\_002504405.1:0.0581924,RS\_GCF\_009911715.1:0.0463818)0.978:0.0214578,RS\_GCF\_900767505.1:0.0749491)1.0:0.0274621,((GB\_GCA\_002506425.1:0.0357967,GB\_GCA\_006954465.1:0.036676)1.0:0.0220894,GB\_GCA\_002504495.1:0.10607)1.0:0.0670401)'1.0:g\_\_UBA71':0.030359,(GB\_GCA\_001563305.1:0.0802806,GB\_GCA\_002506175.1:0.0673079)'1.0:g\_\_ISO4-G1':0.0792655)1.0:0.0660357)0.841:0.0211422,(((GB\_GCA\_002505345.1:0.0130668,GB\_GCA\_002509405.1:0.0128657)0.996:0.00934784,GB\_GCA\_002498365.1:0.0205125)1.0:0.0291389,GB\_GCA\_011620825.1:0.0502127)1.0:0.0662598,GB\_GCA\_002498605.1:0.15149)'1.0:g\_\_VadinCA11':0.113927)0.999:0.0285689,GB\_GCA\_012515075.1:0.155723)1.0:0.0351088,((((GB\_GCA\_001421175.1:0.0160555,GB\_GCA\_002506255.1:0.021804)0.972:0.0121988,GB\_GCA\_002502965.1:0.0260071)0.999:0.026858,GB\_GCA\_012522645.1:0.0595771)'1.0:g\_\_RumEn-M2':0.141456,GB\_GCA\_012520845.1:0.253076)1.0:0.0545524,GB\_GCA\_006954405.1:0.179319)0.968:0.034778)1.0:0.046205,(((GB\_GCA\_009776695.1:0.0929949,GB\_GCA\_009780575.1:0.0998093)0.643:0.0157221,(GB\_GCA\_009780795.1:0.0853407,GB\_GCA\_009784745.1:0.0956506)0.902:0.0165811)0.685:0.0220514,GB\_GCA\_009778265.1:0.0840576)'1.0:g\_\_WRKA01':0.104104)1.0:0.113351,(((GB\_GCA\_003557905.1:0.0303052,GB\_GCA\_007116915.1:0.0193108)1.0:0.0195386,GB\_GCA\_003560875.1:0.0338884)1.0:0.0490124,GB\_GCA\_007117455.1:0.077368)1.0:0.0396838,(GB\_GCA\_003550345.1:0.035678,GB\_GCA\_003555025.1:0.0474436)1.0:0.0739025)'1.0:g\_\_PWHV01':0.0575977,GB\_GCA\_013329105.1:0.125312)1.0:0.123155)'1.0:f\_\_Methanomethylophilaceae':0.142705,((((((((GB\_GCA\_001421185.1:0.034082,GB\_GCA\_002498285.1:0.0302334)0.784:0.0139783,GB\_GCA\_012518185.1:0.138275)0.093:0.0129578,GB\_GCA\_001512965.1:0.0588375)1.0:0.01929,GB\_GCA\_002504525.1:0.0456249)1.0:0.0563971,GB\_GCA\_012519255.1:0.115007)'1.0:g\_\_DTU008':0.0713063,(((GB\_GCA\_002067635.1:0.0233643,GB\_GCA\_012719175.1:0.0233287)1.0:0.0772215,GB\_GCA\_002508545.1:0.0703448)1.0:0.060586,RS\_GCF\_000308215.1:0.0989412)'0.731:g\_\_Methanomassiliococcus':0.028993)0.968:0.0399312,RS\_GCF\_000404225.1:0.190064)'1.0:f\_\_Methanomassiliococcaceae':0.122375,((((GB\_GCA\_002497075.1:0.0178575,GB\_GCA\_013329565.1:0.0222282)1.0:0.0279945,GB\_GCA\_012729095.1:0.0488839)1.0:0.0290193,GB\_GCA\_002067045.1:0.0548174)1.0:0.0323932,GB\_GCA\_004525545.1:0.0791996)'1.0:g\_\_UBA472':0.174662,(GB\_GCA\_002067865.1:0.125158,GB\_GCA\_013415865.1:0.113151)'1.0:g\_\_MVRC01':0.0914352)1.0:0.0597239,(GB\_GCA\_003135935.1:0.0269552,GB\_GCA\_003153895.1:0.0295917)'1.0:g\_\_FEN-33':0.224582)0.999:f\_\_UBA472':0.0426267)0.97:0.0319979,((GB\_GCA\_011334735.1:0.0237717,GB\_GCA\_014361295.1:0.0193489)'1.0:f\_\_JACIVX01;g\_\_JACIVX01':0.181071,GB\_GCA\_013415695.1:0.218814)0.952:0.0344053)1.0:0.0426427)'1.0:o\_\_Methanomassiliococcales':0.110357,(((GB\_GCA\_001800

675.1:0.0324608,GB\_GCA\_001800815.1:0.0238363)'1.0:g\_\_COMBO-56-  
21':0.13635,(GB\_GCA\_011391345.1:0.012458,GB\_GCA\_013329135.1:0.0131489)'1.0:g\_\_UBA9653':0  
.133283)0.866:0.0404935,GB\_GCA\_013331315.1:0.155559)'1.0:f\_\_UBA10834':0.142818,(GB\_GCA\_0  
11046235.1:0.219847,GB\_GCA\_011355145.1:0.19404)'1.0:f\_\_DTMW01':0.1646)'1.0:o\_\_UBA10834':  
0.0921523)1.0:0.0559363,((((((((((GB\_GCA\_005878525.1:0.0205248,GB\_GCA\_005879045.1:0.01384  
72)0.992:0.0113851,GB\_GCA\_005878665.1:0.0354832)0.881:0.00932677,(GB\_GCA\_005878515.1:0.0  
154671,GB\_GCA\_005878985.1:0.0166627)1.0:0.0203531)1.0:0.0369723,((GB\_GCA\_005878395.1:0.0  
00888829,GB\_GCA\_005878485.1:0.00135313)1.0:0.0151597,GB\_GCA\_005878995.1:0.0163685)1.0:0  
.0568085)1.0:0.0231147,(((GB\_GCA\_005879015.1:0.0129826,GB\_GCA\_005879065.1:0.0143841)1.0:  
0.0200093,GB\_GCA\_005878385.1:0.0398742)1.0:0.0307778,(GB\_GCA\_005878615.1:0.0203434,GB\_  
GCA\_005878635.1:0.017927)1.0:0.0526316)1.0:0.024665,GB\_GCA\_005878325.1:0.0887333)0.999:0.  
0223781)0.409:0.0169571,GB\_GCA\_005878415.1:0.0901438)1.0:0.0508806,GB\_GCA\_013329855.1:0  
.132338)0.994:0.0244385,(((GB\_GCA\_001800745.1:0.127401,GB\_GCA\_001800825.1:0.113725)0.9:0.  
022117,GB\_GCA\_011362635.1:0.11072)0.989:0.024411,GB\_GCA\_011331255.1:0.162901)0.134:0.02  
24513)'1.0:g\_\_RBG-16-68-  
12':0.104688,(GB\_GCA\_005878915.1:0.105337,GB\_GCA\_005878955.1:0.0798801)'1.0:g\_\_EA-  
19':0.142665)1.0:0.0638041,GB\_GCA\_005878375.1:0.257032)'1.0:f\_\_RBG-16-68-  
12':0.124599,GB\_GCA\_004377185.1:0.337695)'1.0:o\_\_RBG-16-68-  
12':0.0679839,(((GB\_GCA\_002496385.1:0.0676355,GB\_GCA\_002499085.1:0.103634)1.0:0.0551088,  
GB\_GCA\_013791785.1:0.120952)'1.0:g\_\_UBA147':0.137942,GB\_GCA\_001595885.1:0.216879)'1.0:o\_\_  
\_SG8-5;f\_\_SG8-  
5':0.192728)0.994:0.0402373)0.996:0.0451831,((((GB\_GCA\_002495185.1:0.0778226,GB\_GCA\_0025  
03985.1:0.0639066)1.0:0.121886,GB\_GCA\_013290045.1:0.204053)0.601:0.0491122,GB\_GCA\_01304  
4425.1:0.168451)'1.0:f\_\_UBA184;g\_\_UBA184':0.482394,GB\_GCA\_011363025.1:0.375068)'1.0:o\_\_UB  
A184':0.105251,GB\_GCA\_011333475.1:0.373739)0.927:0.0422578)0.976:0.0392093,((((GB\_GCA\_00  
3560595.1:0.113306,GB\_GCA\_007133925.1:0.156547)0.999:0.0354152,GB\_GCA\_003553085.1:0.110  
998)'1.0:g\_\_PWKY01':0.0829632,GB\_GCA\_003552585.1:0.19188)1.0:0.0642227,GB\_GCA\_007129655  
.1:0.260555)0.998:0.0458091,(((GB\_GCA\_003551675.1:0.106062,GB\_GCA\_003554965.1:0.140286)0.  
0:0.0222149,GB\_GCA\_003555395.1:0.0837041)'1.0:g\_\_PWHR01':0.154621,GB\_GCA\_003551065.1:0.  
189193)0.98:0.0412961)'1.0:o\_\_PWKY01;f\_\_PWKY01':0.321775)0.424:0.0292233,((((((((GB\_GCA\_0  
02204705.1:0.0619992,GB\_GCA\_011334705.1:0.0618737)'1.0:g\_\_B-  
DKE':0.2405,GB\_GCA\_000965745.1:0.27819)1.0:0.0578027,((GB\_GCA\_002498845.1:0.225614,GB\_G  
CA\_002503205.1:0.281472)1.0:0.0737455,RS\_GCF\_001316105.1:0.301082)0.965:0.0427032)0.983:0.  
0361823,((GB\_GCA\_000496135.1:0.253983,RS\_GCF\_900083515.1:0.335482)1.0:0.116603,(GB\_GCA\_  
002502705.1:0.173849,GB\_GCA\_011370275.1:0.188309)'1.0:g\_\_UBA582':0.2214)0.797:0.0446283)1  
.0:0.0425813,(((RS\_GCF\_000152265.2:0.00145353,RS\_GCF\_002078355.1:0.00291237)1.0:0.061729  
6,GB\_GCA\_002505185.1:0.0558609)'1.0:g\_\_Ferroplasma':0.14841,RS\_GCF\_001402945.1:0.149464)1  
.0:0.0969923,RS\_GCF\_900176435.1:0.22157)1.0:0.145238)0.712:0.0439517,(((RS\_GCF\_000195915.1  
:0.042562,GB\_GCA\_008709555.1:0.032795)1.0:0.0275421,RS\_GCF\_003205235.1:0.0425179)1.0:0.08  
9752,RS\_GCF\_000011185.1:0.133994)'1.0:g\_\_Thermoplasma':0.207382)'1.0:f\_\_Thermoplasmatacea  
e':0.239453,(GB\_GCA\_001856825.1:0.170072,GB\_GCA\_011358095.1:0.152947)'1.0:f\_\_GCA-  
001856825;g\_\_GCA-  
001856825':0.420369)'1.0:o\_\_Thermoplasmatales':0.102512,(GB\_GCA\_002878135.1:0.0743164,GB\_  
GCA\_009758405.1:0.0766569)'1.0:o\_\_ARK-15;f\_\_ARK-15;g\_\_ARK-  
15':0.336667)0.97:0.0636302,(((RS\_GCF\_000025665.1:0.0841676,RS\_GCF\_000327505.1:0.0840654)'  
1.0:g\_\_Aciduliprofundum':0.0781613,GB\_GCA\_013154005.1:0.177108)'1.0:f\_\_Aciduliprofundaceae':  
0.131483,GB\_GCA\_002011395.1:0.31001)'0.999:o\_\_Aciduliprofundales':0.0662599)0.999:0.0533691  
,GB\_GCA\_003649695.1:0.555204)1.0:0.0720562,GB\_GCA\_003649915.1:0.449421)0.999:0.0541129)'

0.996:c\_\_Thermoplasmata':0.0307206)1.0:0.0358,((((((((((GB\_GCA\_002496355.1:0.0505736,GB\_GC  
A\_002506745.1:0.0432943)1.0:0.0273996,(GB\_GCA\_003942085.1:0.0536299,GB\_GCA\_902384685.1:  
0.0684413)0.959:0.0159406)0.877:0.0183384,(GB\_GCA\_001595945.1:0.0672273,GB\_GCA\_00290055  
5.1:0.04683)1.0:0.0446342)'1.0:g\_\_SM1-  
50':0.0913563,GB\_GCA\_903877165.1:0.215487)1.0:0.075974,GB\_GCA\_903930505.1:0.195255)1.0:0.  
0703502,(((GB\_GCA\_001595915.1:0.138258,GB\_GCA\_002900535.1:0.143711)0.964:0.0316451,GB\_  
GCA\_003651045.1:0.117783)1.0:0.0569488,(GB\_GCA\_002254885.1:0.28087,GB\_GCA\_003649845.1:  
0.172005)1.0:0.072451)0.992:0.0375063)0.834:0.0348351,GB\_GCA\_003649715.1:0.165011)'1.0:f\_\_  
DHVEG-  
1':0.0897468,((GB\_GCA\_003650935.1:0.193188,GB\_GCA\_003651105.1:0.239802)'1.0:f\_\_B18-  
G2':0.0757096,GB\_GCA\_003649745.1:0.244218)0.0:0.0275485)'1.0:o\_\_DHVEG-  
1':0.107015,((((GB\_GCA\_002011355.1:0.0944885,GB\_GCA\_011052825.1:0.127292)0.0:0.0138085,G  
B\_GCA\_003650975.1:0.199488)0.981:0.0340305,((GB\_GCA\_014361195.1:0.0645663,GB\_GCA\_01436  
1245.1:0.0619335)'1.0:g\_\_JACIWB01':0.153208,GB\_GCA\_008297865.1:0.107497)1.0:0.0461128)'1.0:  
f\_\_JdFR-  
43':0.111512,(GB\_GCA\_008297795.1:0.134396,GB\_GCA\_011049295.1:0.235673)'1.0:f\_\_DSCA01':0.0  
993051)1.0:0.0674095,GB\_GCA\_002502685.1:0.326288)'1.0:o\_\_UBA202':0.0979346)0.311:0.033335  
4,((GB\_GCA\_013329495.1:0.00355278,GB\_GCA\_013329505.1:0.00330525)'1.0:f\_\_UBA9212;g\_\_UBA  
9212':0.423861,GB\_GCA\_002838935.1:0.352224)'1.0:o\_\_UBA9212':0.0768278)'1.0:c\_\_E2':0.095199  
7,(GB\_GCA\_003009755.1:0.221346,GB\_GCA\_003561665.1:0.19673)'1.0:c\_\_SW-10-69-26;o\_\_SW-10-  
69-26;f\_\_SW-10-69-  
26':0.446993)0.973:0.0346264)0.927:0.0250814,((GB\_GCA\_002495235.1:0.141979,GB\_GCA\_011620  
765.1:0.121499)'1.0:o\_\_UBA287;f\_\_UBA287;g\_\_UBA287':0.44786,GB\_GCA\_002494765.1:0.553155)'  
1.0:c\_\_UBA186':0.107321)0.986:0.0376505,(GB\_GCA\_003663565.1:0.0613734,GB\_GCA\_003663585.  
1:0.085739)'1.0:c\_\_B47-G6;o\_\_B47-G6B;f\_\_47-G6;g\_\_B47-  
G6':0.56887)'1.0:p\_\_Thermoplasmata':0.0609196)1.0:0.0602804,((((((((((((((((((((((((((((GB\_GCA\_90  
0316895.1:0.01268,GB\_GCA\_900320515.1:0.0137201)0.98:0.00720467,(GB\_GCA\_902764015.1:0.02  
65187,GB\_GCA\_902794475.1:0.0211927)0.868:0.0070912)1.0:0.018229,GB\_GCA\_902788255.1:0.03  
47964)0.651:0.0083898,(GB\_GCA\_902772665.1:0.0214555,GB\_GCA\_902782595.1:0.00752945)1.0:0.  
0523749)0.887:0.00672624,(RS\_GCF\_003111625.1:0.029637,GB\_GCA\_902774605.1:0.0359611)0.99  
2:0.00902983)0.782:0.00774635,GB\_GCA\_900313645.1:0.0440445)0.996:0.00993501,GB\_GCA\_9027  
85855.1:0.0635689)0.999:0.0124563,(((RS\_GCF\_003814835.1:0.0299323,RS\_GCF\_900769095.1:0.03  
12373)1.0:0.0312594,GB\_GCA\_902770715.1:0.0274457)0.389:0.00961765,RS\_GCF\_001548675.1:0.0  
33214)0.998:0.00979586)0.934:0.00718789,((GB\_GCA\_900314615.1:0.036481,GB\_GCA\_902764455.  
1:0.0289189)0.888:0.0121059,(GB\_GCA\_900318035.1:0.0128489,GB\_GCA\_902771435.1:0.00562137  
)1.0:0.0313424)1.0:0.0174703)0.957:0.00750459,(((GB\_GCA\_900314695.1:0.00704917,GB\_GCA\_90  
0320955.1:0.0143388)1.0:0.0148809,GB\_GCA\_902801725.1:0.0279156)0.041:0.00590805,GB\_GCA\_  
900319985.1:0.0305391)1.0:0.0157823,GB\_GCA\_902789505.1:0.0419704)0.991:0.00917305)1.0:0.0  
382434,RS\_GCF\_001639275.1:0.0872965)0.559:0.0185073,(((RS\_GCF\_001477655.1:0.0268985,GB\_  
GCA\_902777885.1:0.0313286)0.955:0.00724838,(RS\_GCF\_900103415.1:0.0477398,GB\_GCA\_900317  
865.1:0.0231276)0.868:0.00768489)0.724:0.00737135,((GB\_GCA\_900319535.1:0.00165321,GB\_GCA  
\_902768765.1:0.0075478)0.75:0.000316342,GB\_GCA\_902763935.1:0.000633113)1.0:0.0264918)1.0:  
0.0181632,GB\_GCA\_902796575.1:0.0875842)0.995:0.0198643,GB\_GCA\_902783085.1:0.0502605)1.0  
:0.0380697)1.0:0.0354569,(RS\_GCF\_000016525.1:0.0101175,RS\_GCF\_002252585.1:0.0085581)1.0:0.  
0696303)0.998:0.0235218,((GB\_GCA\_002496065.1:0.0373944,RS\_GCF\_900766745.1:0.0461358)1.0:  
0.067499,RS\_GCF\_003111605.1:0.0732724)0.527:0.0187084)'1.0:g\_\_Methanobrevibacter\_A':0.1101  
79,((RS\_GCF\_000320505.1:0.0656226,GB\_GCA\_900314605.1:0.106862)0.364:0.0256067,(RS\_GCF\_0  
00621965.1:0.0173106,RS\_GCF\_002208625.1:0.0264905)1.0:0.0633689)'1.0:g\_\_Methanobrevibacter

\_B':0.108207)0.965:0.031069,((((((GB\_GCA\_004553595.1:0.00902679,GB\_GCA\_902784195.1:0.00655032)1.0:0.0139049,GB\_GCA\_902774685.1:0.0183972)0.994:0.00872597,GB\_GCA\_902769175.1:0.0350861)1.0:0.0138885,RS\_GCF\_900114585.1:0.0467514)1.0:0.0232838,(RS\_GCF\_000024185.1:0.0319793,GB\_GCA\_900321995.1:0.0376378)1.0:0.0214832)1.0:0.0445576,GB\_GCA\_900314635.1:0.086844)'1.0:g\_\_Methanobrevibacter':0.0812477)0.81:0.0248844,GB\_GCA\_002495685.1:0.151785)1.0:0.0634137,((((((RS\_GCF\_000513315.1:0.0111678,RS\_GCF\_002072215.1:0.0099176)1.0:0.0528252,GB\_GCA\_003315655.1:0.077528)1.0:0.0317456,GB\_GCA\_009784145.1:0.0937734)1.0:0.0305371,RS\_GCF\_001639285.1:0.101639)0.884:0.0199879,(GB\_GCA\_009776495.1:0.0607335,GB\_GCA\_009777005.1:0.050277)1.0:0.0780562)'0.994:g\_\_Methanobrevibacter\_C':0.0266414,(RS\_GCF\_001639265.1:0.131604,RS\_GCF\_001639295.1:0.189048)'1.0:g\_\_Methanobrevibacter\_D':0.0457912)0.886:0.0248661)1.0:0.108655,GB\_GCA\_902795935.1:0.193236)0.998:0.0355237,(((GB\_GCA\_002509745.1:0.00996963,GB\_GCA\_002839705.1:0.0159165)'1.0:g\_\_UBA349':0.0867119,GB\_GCA\_002504725.1:0.0976153)0.969:0.0238901,(GB\_GCA\_003558085.1:0.131866,GB\_GCA\_003600755.1:0.0738678)'1.0:g\_\_UBA588':0.0618184)0.999:0.0327792)0.984:0.0272508,((((((((GB\_GCA\_003266105.1:0.0481322,GB\_GCA\_902797085.1:0.0431737)0.303:0.0097692,(GB\_GCA\_013330915.1:0.00305355,GB\_GCA\_013331465.1:0.00580513)1.0:0.0378732)0.909:0.01049,GB\_GCA\_003266165.1:0.0632029)1.0:0.0497232,(((GB\_GCA\_003266065.1:0.0382662,RS\_GCF\_003268005.1:0.0201661)0.204:0.00908896,GB\_GCA\_003266145.1:0.0187721)1.0:0.0544106,GB\_GCA\_003266075.1:0.111609)1.0:0.0373093)1.0:0.0217672,(((GB\_GCA\_002509095.1:0.00195732,GB\_GCA\_900322125.1:0.00181931)1.0:0.0642097,RS\_GCF\_001729965.1:0.0648413)0.326:0.0146211,RS\_GCF\_000012545.1:0.0655761)0.998:0.0166072)0.975:0.0342669,RS\_GCF\_003149675.1:0.0998312)'1.0:g\_\_Methanosphaera':0.31933,(((RS\_GCF\_000302455.1:0.0256562,GB\_GCA\_000309865.1:0.0207043)1.0:0.018745,RS\_GCF\_002813695.1:0.0400376)0.999:0.016113,((GB\_GCA\_001316325.1:0.0129502,GB\_GCA\_003491305.1:0.00410637)1.0:0.0119198,RS\_GCF\_000499765.1:0.0366726)1.0:0.0422104)1.0:0.0277223,((GB\_GCA\_002496805.1:0.0301002,GB\_GCA\_012838205.1:0.0279157)1.0:0.0542103,GB\_GCA\_002067065.1:0.0511703)1.0:0.0168286)0.514:0.0130033,GB\_GCA\_013403005.1:0.0519506)'1.0:g\_\_Methanobacterium':0.104403)0.985:0.0304564,((((GB\_GCA\_003158115.1:0.0117237,GB\_GCA\_003164415.1:0.0207184)0.994:0.00846945,GB\_GCA\_003151535.1:0.0125969)1.0:0.0303134,(GB\_GCA\_003162115.1:0.0155732,GB\_GCA\_003162655.1:0.00996246)1.0:0.029926)1.0:0.0198276,RS\_GCF\_000744455.1:0.0469208)1.0:0.0346974,(RS\_GCF\_000191585.1:0.0193225,GB\_GCA\_009712615.1:0.0143334)1.0:0.0786175)'1.0:g\_\_Methanobacterium\_B':0.0685205,((RS\_GCF\_000214725.1:0.0570751,GB\_GCA\_002498385.1:0.0886458)1.0:0.0353947,RS\_GCF\_900095295.1:0.100963)'1.0:g\_\_Methanobacterium\_C':0.0304862)1.0:0.0304223)0.652:0.016197,((((GB\_GCA\_002502855.1:0.0179932,GB\_GCA\_011620845.1:0.0190534)0.8:0.00326356,GB\_GCA\_002067325.1:0.00644579)0.203:0.00311696,GB\_GCA\_002495625.1:0.00978196)1.0:0.031665,GB\_GCA\_002494495.1:0.0831392)1.0:0.0651601,GB\_GCA\_002067565.1:0.0803586)0.93:0.0239469,(GB\_GCA\_003161815.1:0.0418914,GB\_GCA\_003166335.1:0.0391557)1.0:0.0804573)'1.0:g\_\_Methanobacterium\_A':0.0530146)1.0:0.0333316,(((RS\_GCF\_000745485.1:0.0118288,RS\_GCF\_002287175.1:0.0129597)0.986:0.00805265,GB\_GCA\_002509665.1:0.0250888)1.0:0.0715302,(GB\_GCA\_002494885.1:0.0413261,GB\_GCA\_002505765.1:0.0654086)1.0:0.04518)'1.0:g\_\_Methanobacterium\_D':0.0662608)1.0:0.0385551,GB\_GCA\_003491285.1:0.142422)1.0:0.0469116)'1.0:f\_\_Methanobacteriaceae':0.0658151,(((RS\_GCF\_000008645.1:0.0265742,RS\_GCF\_000828575.1:0.00491226)1.0:0.0295935,RS\_GCF\_000145295.1:0.0354208)1.0:0.0423759,RS\_GCF\_900095815.1:0.0572148)'1.0:f\_\_Methanothermobacteraceae:g\_\_Methanothermobacter':0.11682)1.0:0.0502664,(((GB\_GCA\_001507955.1:0.0418366,RS\_GCF\_003264935.1:0.0367692)0.826:0.0103636,GB\_GCA\_012840175.1:0.0291694)1.0:0.0219141,(GB\_GCA\_003584625.1:0.0435341,GB\_GCA\_011370395.1:0.0380238)1.0:0.0287466)'1.0:f\_\_Methanothermobacteraceae\_A:g\_\_Methanothermobacter\_A':0.108467)1.0:0.0936266,RS\_GCF\_000166095.1:0.214706)'1.0:c\_\_Methanobacteria;o\_\_Methanobacteriales':0.184461,((((((((RS\_GCF\_000017225.1:0.018493,RS\_GCF\_000018485.1:0.0123941)0.901:0.0057994,RS\_GCF\_000016125.1:0.0142453)1.0:0.01355

63,RS\_GCF\_002945325.1:0.0232536)1.0:0.0615523,RS\_GCF\_000017165.1:0.0924954)1.0:0.0691369,RS\_GCF\_000006175.1:0.211083)'1.0:g\_\_Methanococcus':0.0813368,RS\_GCF\_000376965.1:0.0901947)1.0:0.03866,((RS\_GCF\_000017185.1:0.183032,RS\_GCF\_000179575.2:0.0694153)'1.0:g\_\_Methanotermococcus\_A':0.0394297,(RS\_GCF\_003351865.1:0.0312264,RS\_GCF\_004310395.1:0.0509472)'1.0:g\_\_Methanofervidococcus':0.139697)0.766:0.0401944)1.0:0.0895087,(RS\_GCF\_000214415.1:0.0256162,RS\_GCF\_000243455.1:0.0444666)'1.0:g\_\_Methanotorris':0.0666945)'1.0:f\_\_Methanococcaceae':0.0599481,((((RS\_GCF\_000023985.1:0.0355312,RS\_GCF\_000739065.1:0.017688)0.979:0.00891596,RS\_GCF\_000025525.1:0.0152496)0.985:0.00848393,RS\_GCF\_000091665.1:0.0163798)1.0:0.0182784,(RS\_GCF\_000024625.1:0.0114987,GB\_GCA\_013153845.1:0.00805832)1.0:0.058603)'1.0:g\_\_Methanocaldococcus':0.0360089,(RS\_GCF\_000092305.1:0.139736,RS\_GCF\_000371805.1:0.110648)'1.0:g\_\_Methanocaldococcus\_A':0.0500328)'1.0:f\_\_Methanocaldococcaceae':0.093699)'1.0:c\_\_Methanococci;o\_\_Methanococcales':0.296268)0.881:0.043631,((RS\_GCF\_000007185.1:0.00990988,RS\_GCF\_002201895.1:0.0271506)1.0:0.113121,GB\_GCA\_013154335.1:0.14461)'1.0:c\_\_Methanopyri;o\_\_Methanopyrales;f\_\_Methanopyraceae;g\_\_Methanopyrus':0.392787)0.997:0.0336377,((((((((((((RS\_GCF\_00221185.1:0.00830723,RS\_GCF\_012027645.1:0.00818696)0.99:0.00371727,(RS\_GCF\_001484195.1:0.00942483,RS\_GCF\_012027495.1:0.0127662)1.0:0.00568023)0.135:0.00110162,RS\_GCF\_006274605.1:0.0122897)0.994:0.00651074,RS\_GCF\_904067545.1:0.0103266)1.0:0.0181985,GB\_GCA\_011050175.1:0.0352533)0.987:0.00879049,((((RS\_GCF\_002214565.1:0.0124789,RS\_GCF\_012027615.1:0.0187224)0.942:0.00549725,RS\_GCF\_002214465.1:0.0260374)0.891:0.00592621,RS\_GCF\_012027305.1:0.0129629)0.412:0.00754734,RS\_GCF\_002214545.1:0.0222216)0.996:0.00756021,(RS\_GCF\_002214365.1:0.0404855,RS\_GCF\_002214525.1:0.086895)1.0:0.0270048)0.999:0.00959042)0.42:0.00775387,RS\_GCF\_000265525.1:0.0345096)0.837:0.00743731,(RS\_GCF\_002214485.1:0.0360678,RS\_GCF\_002214505.1:0.0319177)0.974:0.0111525)0.96:0.00639168,((RS\_GCF\_000018365.1:0.0126688,RS\_GCF\_012027395.1:0.00656623)1.0:0.0173022,(RS\_GCF\_001647085.1:0.0132309,RS\_GCF\_012027555.1:0.00511042)1.0:0.0234046)1.0:0.0267519,RS\_GCF\_012027355.1:0.0360928)0.267:0.00675983)1.0:0.0255309,(((RS\_GCF\_000258515.1:0.056245,RS\_GCF\_002214385.1:0.0165161)1.0:0.0301353,(RS\_GCF\_002214585.1:0.0363092,RS\_GCF\_012027595.1:0.0708181)1.0:0.0237889)0.94:0.00982458,((RS\_GCF\_000022365.1:0.0145098,RS\_GCF\_000151205.2:0.0150601)1.0:0.0165035,RS\_GCF\_000816105.1:0.0265595)1.0:0.0233232)0.303:0.0133398,(((RS\_GCF\_012027635.1:0.00919574,RS\_GCF\_900198835.1:0.0116818)0.531:0.00327941,RS\_GCF\_000585495.1:0.00730831)1.0:0.0208824,RS\_GCF\_000769655.1:0.0275812)1.0:0.0202081,(RS\_GCF\_000009965.1:0.0120216,RS\_GCF\_001592435.1:0.013319)1.0:0.0384705)1.0:0.0123777)0.991:0.0138925)0.996:0.0206585,GB\_GCA\_013153595.1:0.164388)'1.0:g\_\_Thermococcus':0.0491936,((((GB\_GCA\_003663525.1:0.0102939,GB\_GCA\_003663535.1:0.0087356)0.999:0.0103577,RS\_GCF\_000022545.1:0.0192117)1.0:0.0403968,(RS\_GCF\_001317345.1:0.00466353,RS\_GCF\_012027425.1:0.0113334)1.0:0.0378161)1.0:0.0349388,((RS\_GCF\_000246985.2:0.00893534,RS\_GCF\_001484685.1:0.0239476)1.0:0.0137336,RS\_GCF\_000430485.1:0.0220017)1.0:0.0174083)'1.0:g\_\_Thermococcus\_A':0.0549511,((((GB\_GCA\_003660495.1:0.00184835,GB\_GCA\_003663695.1:0.00134854)1.0:0.0710233,RS\_GCF\_000725425.1:0.0454562)1.0:0.0282055,RS\_GCF\_000966265.1:0.110447)'1.0:g\_\_Palaeococcus':0.0451813,GB\_GCA\_002009975.1:0.0834744)1.0:0.0269001)0.997:0.016869,((RS\_GCF\_000517445.1:0.0172437,RS\_GCF\_012027325.1:0.0109839)0.985:0.00869599,RS\_GCF\_000151105.2:0.018299)'1.0:g\_\_Thermococcus\_B':0.0385264)1.0:0.0338228)0.998:0.0273403,((((RS\_GCF\_001577775.1:0.0126037,GB\_GCA\_003660485.1:0.0188948)0.079:0.00486338,RS\_GCF\_002214605.1:0.0147945)1.0:0.0201971,RS\_GCF\_000263735.1:0.0384433)1.0:0.0158457,((RS\_GCF\_000011105.1:0.0422647,RS\_GCF\_000195935.2:0.0323201)0.905:0.0128684,RS\_GCF\_000211475.1:0.0452394)1.0:0.0223444)0.773:0.0137426,RS\_GCF\_000007305.1:0.0536943)1.0:0.0402347,RS\_GCF\_000215995.1:0.0573436)'1.0:g\_\_Pyrococcus':0.0345102)'1.0:o\_\_Thermococcales;f\_\_Thermococcaceae':0.286289,((((GB\_GCA\_001587575.1:0.0281999,GB\_GCA\_013178285.1:0.0313441)0.99:0.00946324,(GB\_GCA\_001587595.1:0.0137467,GB\_GCA\_012799835.1:0.0279355)1.0:0.0570421)0.977:0.0094491,(GB





6:0.00470684)0.993:0.0113529,((RS\_GCF\_000220175.1:0.0238988,GB\_GCA\_012030815.1:0.0259054)1.0:0.0289419,GB\_GCA\_000204585.1:0.0458515)1.0:0.0160291)0.467:0.00988219,GB\_GCA\_002737445.1:0.0699802)'1.0:g\_\_Nitrosarchaeum':0.0449586,GB\_GCA\_002781805.1:0.0998756)0.354:0.0128422)0.942:0.0181589,(GB\_GCA\_011773785.1:0.0620117,GB\_GCA\_013867335.1:0.0543711)'1.0:g\_\_JACEMX01':0.0471639)1.0:0.0655236,(((GB\_GCA\_003724275.1:0.0386709,GB\_GCA\_007570915.1:0.0377232)1.0:0.327345,GB\_GCA\_000200715.1:0.200404)'0.991:g\_\_Cenarchaeum':0.0688546,(GB\_GCA\_009840065.1:0.0836323,GB\_GCA\_009843815.1:0.0774284)'1.0:g\_\_VYCS01':0.338208)1.0:0.0797856)0.294:0.0197615,(GB\_GCA\_003352285.1:0.00540256,RS\_GCF\_014078545.1:0.00505164)'1.0:g\_\_PXYB01':0.125572)0.974:0.0246005,GB\_GCA\_011055585.1:0.157548)0.871:0.0181282,GB\_GCA\_011523285.1:0.400763)0.273:0.0124264,((((GB\_GCA\_000402075.1:0.0279633,RS\_GCF\_013390745.1:0.0120199)1.0:0.0304399,(RS\_GCF\_013390375.1:0.0169037,RS\_GCF\_013390765.1:0.0390922)1.0:0.0322591)0.893:0.0112278,RS\_GCF\_013390785.1:0.0620773)0.873:0.0125062,(((GB\_GCA\_002709285.1:0.0093394,GB\_GCA\_902578515.1:0.0110546)0.993:0.0177422,GB\_GCA\_902590655.1:0.0185652)1.0:0.0189293,GB\_GCA\_902606965.1:0.0368658)1.0:0.0317063)1.0:0.0534652,(GB\_GCA\_000746705.1:0.0684702,GB\_GCA\_012964965.1:0.0546152)1.0:0.0490453)1.0:0.122709,((((((RS\_GCF\_000812185.1:0.0231795,GB\_GCA\_902552015.1:0.0127885)0.74:0.0055242,GB\_GCA\_902511735.1:0.032854)0.975:0.00986891,GB\_GCA\_001510295.1:0.0512942)0.871:0.0120679,GB\_GCA\_902512865.1:0.0522898)0.842:0.00984347,(GB\_GCA\_001627235.1:0.00908214,GB\_GCA\_902566725.1:0.0210311)1.0:0.0263656)1.0:0.10707,(GB\_GCA\_002698885.1:0.103939,GB\_GCA\_902606945.1:0.107324)0.774:0.0234022)1.0:0.0675468,GB\_GCA\_902608175.1:0.163525)1.0:0.0618721)'1.0:g\_\_Nitrosopelagicus':0.0475567)0.206:0.0191896,(GB\_GCA\_001443365.1:0.0710521,GB\_GCA\_008974855.1:0.0846007)'1.0:g\_\_CSP1-1':0.0745227)1.0:0.0406739,((((((GB\_GCA\_002499525.1:0.0666918,GB\_GCA\_010028495.1:0.0390181)0.983:0.0115567,(RS\_GCF\_002787055.1:0.0252772,GB\_GCA\_900299125.1:0.067474)0.997:0.0117411)1.0:0.023532,RS\_GCF\_000955905.1:0.0447738)1.0:0.0602582,GB\_GCA\_005240025.1:0.116396)0.692:0.0184358,RS\_GCF\_000723185.1:0.0970749)0.991:0.0263725,((RS\_GCF\_000685395.1:0.00646108,RS\_GCF\_013407275.1:0.00896132)1.0:0.0262126,GB\_GCA\_004322465.1:0.0326366)1.0:0.0805133)'1.0:g\_\_Nitrosotenuis':0.0947124)1.0:0.0710229,((((((RS\_GCF\_900143675.1:0.0661891,RS\_GCF\_900177045.1:0.0348989)0.864:0.00877491,RS\_GCF\_011319475.1:0.0255475)0.377:0.00559115,(GB\_GCA\_013288545.1:0.0199984,RS\_GCF\_900065925.1:0.0223124)0.963:0.0117316)0.998:0.0187354,(GB\_GCA\_007280465.1:0.0192775,RS\_GCF\_900167955.1:0.0165879)1.0:0.028837)1.0:0.0738419,RS\_GCF\_011319465.1:0.0983616)0.861:0.0199136,((GB\_GCA\_001920395.1:0.0588663,GB\_GCA\_005877205.1:0.0408919)0.8:0.0141692,GB\_GCA\_001917995.1:0.0575651)0.999:0.0344563)'1.0:g\_\_Nitrosotalea':0.0556983,((GB\_GCA\_007280335.1:0.0175708,GB\_GCA\_013287585.1:0.0203211)1.0:0.0250779,GB\_GCA\_005877305.1:0.0371385)'1.0:g\_\_TA-20':0.0528984)0.999:0.0407964,GB\_GCA\_013330055.1:0.0867793)1.0:0.0690687)'1.0:f\_\_Nitrosopumilaceae':0.229858,((((((GB\_GCA\_000802205.2:0.030896,GB\_GCA\_009379865.1:0.0215634)0.962:0.0148942,(RS\_GCF\_007826885.1:0.0136467,GB\_GCA\_013694585.1:0.00839608)1.0:0.0197242)1.0:0.0781819,(((RS\_GCF\_001870125.1:0.0353649,GB\_GCA\_013114705.1:0.0412951)1.0:0.0335077,RS\_GCF\_900696045.1:0.0726707)1.0:0.039215,RS\_GCF\_008389435.1:0.123394)0.99:0.0370464)1.0:0.0695472,GB\_GCA\_013821245.1:0.144677)'1.0:g\_\_Nitrosocosmicus':0.201581,((GB\_GCA\_014523485.1:0.0930411,GB\_GCA\_014523515.1:0.0720661)'1.0:g\_\_TH1177':0.160556,GB\_GCA\_013114725.1:0.217732)1.0:0.0693467)0.895:0.0413935,(((GB\_GCA\_005877075.1:0.0604911,GB\_GCA\_014523495.1:0.0375637)0.999:0.0249574,(GB\_GCA\_005877345.1:0.0115442,GB\_GCA\_014523525.1:0.0068566)1.0:0.044946)0.0:0.0202825,GB\_GCA\_014523595.1:0.051754)'1.0:g\_\_TA-21':0.270486)0.913:0.0251898,((((((RS\_GCF\_000698785.1:0.0188944,RS\_GCF\_000730285.1:0.0265924)1.0:0.0585034,GB\_GCA\_013388945.1:0.0919001)1.0:0.0415678,GB\_GCA\_013114715.1:0.12866)1.0:0.0451418,((RS\_GCF\_000303155.1:0.0348905,GB\_GCA\_002501845.1:0.0622573)1.0:0.045495,GB

\_GCA\_002494895.1:0.127202)0.996:0.0354225)'1.0:g\_\_Nitrososphaera':0.0959413,((((GB\_GCA\_002501855.1:0.00509136,GB\_GCA\_003176995.1:0.013597)0.987:0.00869552,GB\_GCA\_009665115.1:0.00785405)1.0:0.0796717,RS\_GCF\_009898475.1:0.164148)'1.0:g\_\_UBA10452':0.127473,GB\_GCA\_014523685.1:0.240814)0.828:0.0347478)0.742:0.0331392,((((GB\_GCA\_009377575.1:0.0158331,GB\_GCA\_014523695.1:0.0180843)1.0:0.0398374,GB\_GCA\_014523665.1:0.0412681)0.62:0.0175064,GB\_GCA\_014523625.1:0.0434577)'1.0:g\_\_TH5896':0.265911)0.994:0.0355535)'1.0:f\_\_Nitrososphaeraeae':0.1325)1.0:0.0579688,((((GB\_GCA\_002898655.1:0.025342,RS\_GCF\_900248165.1:0.00969056)1.0:0.0217104,GB\_GCA\_013538805.1:0.0295321)1.0:0.0356328,GB\_GCA\_013538675.1:0.0581357)'1.0:g\_\_Nitrosocaldus':0.246359,GB\_GCA\_013538715.1:0.290594)'1.0:f\_\_Nitrosocaldaceae':0.0669904,(GB\_GCA\_002713325.1:0.158282,GB\_GCA\_011331095.1:0.11017)'1.0:f\_\_UBA213;g\_\_UBA213':0.141408)0.968:0.0480969)1.0:0.145279,((((GB\_GCA\_013306035.1:0.0231387,GB\_GCA\_013378385.1:0.0147789)1.0:0.0530677,GB\_GCA\_002495905.1:0.0645702)1.0:0.113944,GB\_GCA\_002693165.1:0.133328)1.0:0.0969093,GB\_GCA\_002713205.1:0.208495)'1.0:f\_\_UBA57;g\_\_UBA57':0.345346)0.999:0.0521806,(GB\_GCA\_011355215.1:0.0426388,GB\_GCA\_011605775.1:0.0378612)'1.0:f\_\_JAAOZN01;g\_\_JAAOZN01':0.309247)0.081:0.0293964,((((GB\_GCA\_005877225.1:0.0183828,GB\_GCA\_005877365.1:0.0163631)0.996:0.0172039,GB\_GCA\_005877185.1:0.024782)1.0:0.176961,GB\_GCA\_002495205.1:0.264149)0.923:g\_\_UBA183':0.048159,(GB\_GCA\_003135575.1:0.211347,GB\_GCA\_003164815.1:0.186634)'1.0:g\_\_BOG-1369':0.152962)0.978:0.077928,RS\_GCF\_902812495.1:0.255945)'1.0:f\_\_UBA183':0.233713,((GB\_GCA\_013288145.1:0.228574,RS\_GCF\_902812485.1:0.22235)'1.0:f\_\_CADDZS01':0.185851,GB\_GCA\_002495315.1:0.412838)0.935:0.0475076)0.967:0.0475311)0.999:0.0471878,(GB\_GCA\_011358735.1:0.109158,GB\_GCA\_013388925.1:0.156912)'1.0:f\_\_JACAEJ01;g\_\_JACAEJ01':0.231253)'0.999:o\_\_Nitrososphaerales':0.0616329,GB\_GCA\_014361085.1:0.460899)0.808:0.0436537,((((GB\_GCA\_002506605.1:0.0854576,GB\_GCA\_009903795.1:0.0773889)1.0:0.191838,GB\_GCA\_002499005.1:0.279345)'1.0:f\_\_UBA164;g\_\_UBA164':0.338618,(GB\_GCA\_011054345.1:0.139087,RS\_GCF\_013340765.1:0.133589)'1.0:f\_\_Conexivisphaeraeae;g\_\_Conexivisphaera':0.351534)0.287:0.0572017,GB\_GCA\_011333845.1:0.446674)'1.0:o\_\_Conexivisphaerales':0.110951)1.0:0.126794,((((GB\_GCA\_003661505.1:0.000952199,GB\_GCA\_003661525.1:0.000256481)'1.0:g\_\_B109-G9':0.296882,GB\_GCA\_002011085.1:0.24241)1.0:0.111584,GB\_GCA\_002011075.1:0.336816)'1.0:o\_\_Geothermarchaeales;f\_\_JDFR-13':0.362938)1.0:0.0628572,((((((((GB\_GCA\_000405685.1:0.000487921,GB\_GCA\_011337925.1:0.00195401)1.0:0.0571304,GB\_GCA\_011375845.1:0.0481784)1.0:0.0410828,GB\_GCA\_011363825.1:0.0888522)1.0:0.0923965,GB\_GCA\_011364615.1:0.153255)'1.0:g\_\_JGI-0000106-J15':0.0975944,(GB\_GCA\_002255105.1:0.163718,GB\_GCA\_003660635.1:0.173979)'1.0:g\_\_EX4484-121':0.0705562)1.0:0.116201,((GB\_GCA\_011363045.1:0.0505903,GB\_GCA\_011364235.1:0.0488533)1.0:0.03635,GB\_GCA\_003056285.1:0.0713386)'1.0:g\_\_NZ13-MG1':0.243952)'1.0:f\_\_NZ13-MGT':0.0566753,((((GB\_GCA\_000270325.1:0.0211404,GB\_GCA\_011364605.1:0.0199722)1.0:0.169671,(GB\_GCA\_011373345.1:0.171984,GB\_GCA\_011373645.1:0.141599)0.999:0.0489216)'1.0:g\_\_Caldarchaeum':0.133271,GB\_GCA\_002898355.1:0.235042)'1.0:f\_\_Caldarchaeaceae':0.185799)1.0:0.0561996,((((GB\_GCA\_002898395.1:0.0603241,GB\_GCA\_009889515.1:0.0337531)1.0:0.0525617,GB\_GCA\_011373505.1:0.105167)1.0:0.047505,GB\_GCA\_011373385.1:0.14195)'1.0:g\_\_HRBIN02':0.0896492,GB\_GCA\_000494185.1:0.210947)1.0:0.142566,(GB\_GCA\_000494145.1:0.072284,GB\_GCA\_011364265.1:0.0666292)'1.0:g\_\_JGI-OTU-1':0.294786)0.991:0.0505767,(GB\_GCA\_011334935.1:0.0663058,GB\_GCA\_011362255.1:0.0860322)'1.0:g\_\_DTDIO1':0.185768)'1.0:f\_\_HR02':0.176283)'1.0:o\_\_Caldarchaeales':0.220332)'0.99:c\_\_Nitrososphaeria':0.03715,((((GB\_GCA\_011362045.1:0.0593061,GB\_GCA\_011363915.1:0.0830888)1.0:0.0503288,(GB\_GCA\_011389375.1:0.111381,GB\_GCA\_011605725.1:0.118874)0.809:0.0334564)'1.0:f\_\_JAAOZP01;g\_\_JAAOZP01':0.378288,(GB\_GCA\_011371845.1:0.440593,GB\_GCA\_011605715.1:0.466417)0



GCA-

2726865':0.188736)1.0:0.0587161,GB\_GCA\_003662205.1:0.118823)1.0:0.0735578,GB\_GCA\_001593875.1:0.219614)1.0:0.0935187,GB\_GCA\_003601775.1:0.212347)'1.0:o\_\_TCS64;f\_\_TCS64':0.230667)0.993:0.0484513,((((((((((((((GB\_GCA\_005883075.1:0.0174591,GB\_GCA\_005884605.1:0.021721)0.217:0.00443327,GB\_GCA\_005883085.1:0.0162465)0.983:0.00699366,GB\_GCA\_005888745.1:0.0310935)0.951:0.00526949,GB\_GCA\_001918745.1:0.0299052)0.999:0.0122445,((GB\_GCA\_005882895.1:0.0144386,GB\_GCA\_005883695.1:0.0277692)0.384:0.00356074,GB\_GCA\_005881695.1:0.0182136)1.0:0.0143858)0.123:0.00876431,(((GB\_GCA\_005884195.1:0.0182962,GB\_GCA\_005888755.1:0.0160092)1.0:0.0114656,GB\_GCA\_005881615.1:0.0241044)1.0:0.0135287,GB\_GCA\_001918765.1:0.029916)0.981:0.00824193)1.0:0.119589,(((GB\_GCA\_001915065.1:0.0219371,GB\_GCA\_005882905.1:0.0217953)1.0:0.0530375,GB\_GCA\_002495485.1:0.0900813)0.999:0.0318931,((GB\_GCA\_005882955.1:0.014095,GB\_GCA\_005888635.1:0.0228373)0.994:0.0140476,GB\_GCA\_001919285.1:0.0265146)1.0:0.0687269)1.0:0.0910876)'0.997:g\_\_40CM-2-53-6':0.0416122,GB\_GCA\_005888735.1:0.190152)1.0:0.0592794,(GB\_GCA\_005888675.1:0.00557501,GB\_GCA\_005888695.1:0.00677885)'1.0:g\_\_BA-13':0.198005)'1.0:f\_\_40CM-2-53-6':0.233505,(GB\_GCA\_001768965.1:0.0891958,GB\_GCA\_003152955.1:0.0922728)'1.0:f\_\_FEN-987;g\_\_FEN-987':0.270177)1.0:0.08428,((GB\_GCA\_011338225.1:0.0627634,GB\_GCA\_011369655.1:0.0407854)'1.0:f\_\_DTDX01;g\_\_DTDX01':0.230058,(GB\_GCA\_011358085.1:0.297077,GB\_GCA\_011389385.1:0.277155)'1.0:f\_\_DTGE01':0.0788663)1.0:0.0691688)0.477:0.0347221,((GB\_GCA\_001775955.1:0.0348179,GB\_GCA\_007050885.1:0.0571737)'1.0:g\_\_RBG-13-38-9':0.285738,GB\_GCA\_011355205.1:0.187238)'1.0:f\_\_RBG-13-38-9':0.158966)'1.0:o\_\_40CM-2-53-6':0.105324,GB\_GCA\_001775995.1:0.448408)0.883:0.0410714,((((GB\_GCA\_001593855.1:0.0283643,GB\_GCA\_003662305.1:0.0266534)1.0:0.0723184,GB\_GCA\_003662485.1:0.0932825)1.0:0.0785716,GB\_GCA\_003662515.1:0.0967174)'1.0:g\_\_B25':0.138948,((GB\_GCA\_002254975.1:0.115136,GB\_GCA\_003661965.1:0.115504)'1.0:g\_\_EX4484-218':0.104584,GB\_GCA\_002011035.1:0.270775)0.746:0.0579171)'1.0:o\_\_B25;f\_\_B25':0.176698)0.986:0.043707)1.0:0.0474073,((((GB\_GCA\_011369595.1:0.0224009,GB\_GCA\_011374155.1:0.0308284)1.0:0.0280006,GB\_GCA\_011361905.1:0.0523373)1.0:0.0375215,GB\_GCA\_011366665.1:0.0827091)'1.0:g\_\_DTBU01':0.124738,GB\_GCA\_001593865.1:0.127378)'1.0:f\_\_B24':0.229452,(GB\_GCA\_011367275.1:0.103114,GB\_GCA\_011375775.1:0.0900581)'1.0:f\_\_DRYS01;g\_\_DRYS01':0.33382)'1.0:o\_\_B24':0.162188)'0.929:c\_\_Bathyarchaeia':0.0302349)0.0:0.0208924,GB\_GCA\_003661605.1:0.715771)0.999:0.0371071,((((((((((((((GB\_GCA\_003086435.1:0.00823217,RS\_GCF\_009729015.1:0.00362544)0.967:0.00485736,RS\_GCF\_009729545.1:0.00591829)1.0:0.11714,(RS\_GCF\_002116695.1:0.0610672,RS\_GCF\_003201765.2:0.0619962)1.0:0.0977423)1.0:0.0433901,RS\_GCF\_000632495.1:0.229429)'1.0:g\_\_Acidianus':0.0473455,(GB\_GCA\_000565255.1:0.146202,RS\_GCF\_003201835.2:0.149366)1.0:0.0789903)0.915:0.0305294,(((RS\_GCF\_000016605.1:0.0767535,RS\_GCF\_003201675.2:0.110695)0.993:0.0294493,RS\_GCF\_000204925.1:0.136735)1.0:0.0351878,RS\_GCF\_013343295.1:0.140513)1.0:0.0576084,RS\_GCF\_000243315.1:0.149201)'1.0:g\_\_Metallosphaera':0.11938)1.0:0.0666646,(((RS\_GCF\_000022485.1:0.024465,RS\_GCF\_009601705.1:0.0284173)0.916:0.0130733,RS\_GCF\_900079115.1:0.0288142)1.0:0.103727,RS\_GCF\_001719125.1:0.134981)'1.0:g\_\_Saccharolobus':0.0999602,((GB\_GCA\_002495845.1:0.0363228,RS\_GCF\_008326425.1:0.0297505)1.0:0.0605289,RS\_GCF\_001316045.1:0.0973346)'1.0:g\_\_Sulfuracidifex':0.23397)0.999:0.0468223)0.996:0.0388307,(((RS\_GCF\_000012285.1:0.00737919,GB\_GCA\_000508305.1:0.00721012)'1.0:g\_\_Sulfolobus':0.192307,(GB\_GCA\_003086555.1:0.0136011,RS\_GCF\_009729035.1:0.0144565)'1.0:g\_\_Stygiolobus':0.133428)0.999:0.0448228,((RS\_GCF\_00001205.1:0.00568561,RS\_GCF\_009729055.1:0.00431537)1.0:0.00936283,RS\_GCF\_012222305.1:0.0182625)'1.0:g\_\_Sulfurisphaera':0.129817)1.0:0.0661558,GB\_GCA\_000389735.1:0.331382)0.942:0.04211)1.0:0.063073,RS\_GCF\_003967175.1:0.370161)'1.0:f\_\_Sulfolobaceae':0.259138,((RS\_GCF\_00001794

5.1:0.0906073,GB\_GCA\_013154085.1:0.104277)'1.0:g\_\_Ignicoccus\_A':0.120147,RS\_GCF\_001481685.1:0.196076)'1.0:f\_\_Ignicoccaceae':0.306391)1.0:0.0555335,((((((((GB\_GCA\_011361755.1:0.0124101,GB\_GCA\_011380255.1:0.0139292)1.0:0.0709051,GB\_GCA\_011055355.1:0.092932)1.0:0.170913,(GB\_GCA\_011366635.1:0.100676,GB\_GCA\_011375585.1:0.105395)1.0:0.13085)0.623:0.0408396,GB\_GCA\_000145985.1:0.209948)0.981:0.0403426,((GB\_GCA\_011057405.1:0.142161,GB\_GCA\_011366545.1:0.171651)1.0:0.0673879,(GB\_GCA\_011362275.1:0.0555505,GB\_GCA\_011364155.1:0.0318162)1.0:0.133545)1.0:0.0831796)'1.0:g\_\_Ignisphaera':0.114201,GB\_GCA\_013154235.1:0.27032)1.0:0.0721324,(GB\_GCA\_003661775.1:0.110942,GB\_GCA\_003661865.1:0.113678)'1.0:g\_\_QMWT01':0.145898)1.0:0.0975489,GB\_GCA\_003661905.1:0.325093)'1.0:f\_\_Ignisphaeraceae':0.0744778,((((GB\_GCA\_011361945.1:0.0124809,GB\_GCA\_011375725.1:0.0123744)1.0:0.0555868,GB\_GCA\_011364565.1:0.0608236)1.0:0.166721,GB\_GCA\_003056265.1:0.184411)'1.0:g\_\_Zestosphaera':0.144831,(GB\_GCA\_002255065.1:0.249932,GB\_GCA\_003661745.1:0.149788)'0.999:g\_\_EX4484-204':0.072533)0.997:0.0441272,(GB\_GCA\_011373125.1:0.0603425,GB\_GCA\_011375535.1:0.0347026)'1.0:g\_\_DRZP01':0.307342)0.978:0.0495447,(GB\_GCA\_011337845.1:0.133785,GB\_GCA\_011366425.1:0.148557)'1.0:g\_\_DTCV01':0.179532)'1.0:f\_\_NBVN01':0.130426)0.704:0.0492327,((RS\_GCF\_003116855.1:0.122323,GB\_GCA\_011056395.1:0.141211)'1.0:g\_\_AG1':0.180614,GB\_GCA\_009903825.1:0.297353)'1.0:f\_\_AG1':0.198452)1.0:0.0662155)0.518:0.0248174,((((((((GB\_GCA\_002495025.1:0.102627,GB\_GCA\_011056815.1:0.1319)1.0:0.0643737,(GB\_GCA\_011364525.1:0.13058,GB\_GCA\_011375785.1:0.138571)1.0:0.0571035)1.0:0.0543176,(GB\_GCA\_011380145.1:0.116515,GB\_GCA\_011380285.1:0.10233)1.0:0.110374)'1.0:g\_\_UBA285':0.10328,((RS\_GCF\_000092185.1:0.0380324,GB\_GCA\_011053855.1:0.0300901)'1.0:g\_\_Thermosphaera':0.205497,(RS\_GCF\_000186365.1:0.1024,RS\_GCF\_000513855.1:0.104203)'1.0:g\_\_Desulfurococcus':0.111831)0.976:0.0472569)1.0:0.057966,(RS\_GCF\_000264495.1:0.106917,GB\_GCA\_011375875.1:0.112436)'1.0:g\_\_Thermogladius':0.198005)1.0:0.0653536,(((RS\_GCF\_000015945.1:0.0236202,RS\_GCF\_000092465.1:0.0355023)'1.0:g\_\_Staphylothermus':0.118194,GB\_GCA\_013154205.1:0.188159)0.999:0.0565182,((GB\_GCA\_003661825.1:0.188112,GB\_GCA\_011364225.1:0.236354)0.703:0.0343251,GB\_GCA\_002254665.1:0.148238)1.0:0.0547756)0.426:0.0530598,GB\_GCA\_011366735.1:0.330249)0.997:0.0460976)'1.0:f\_\_Desulfurococcaceae':0.215014,(((GB\_GCA\_002899805.1:0.120624,GB\_GCA\_011333245.1:0.132587)'1.0:g\_\_ARK-14':0.143385,RS\_GCF\_000258425.1:0.231329)1.0:0.168123,(GB\_GCA\_009904015.1:0.326418,GB\_GCA\_011380215.1:0.287015)0.89:0.0677577)'1.0:f\_\_Fervidicoccaceae':0.170114)0.992:0.0444735,((((RS\_GCF\_000144915.1:0.0951155,RS\_GCF\_003431325.1:0.102464)1.0:0.101165,GB\_GCA\_002496425.1:0.207048)0.218:0.0336262,GB\_GCA\_000495735.1:0.153368)'1.0:g\_\_Acidilobus':0.138082,((RS\_GCF\_000317795.1:0.0373814,GB\_GCA\_002506595.1:0.034106)1.0:0.115188,GB\_GCA\_002877855.1:0.136634)'1.0:g\_\_Caldisphaera':0.180767)1.0:0.143943,(((RS\_GCF\_000011125.1:0.0411833,RS\_GCF\_000591035.1:0.0319441)'1.0:g\_\_Aeropyrum':0.263497,GB\_GCA\_013152575.1:0.273619)0.961:0.0530923,GB\_GCA\_011367065.1:0.347372)0.999:0.0505382)'1.0:f\_\_Acidilobaceae':0.190598,((((RS\_GCF\_001412615.1:0.0801246,RS\_GCF\_001462395.1:0.0909984)'1.0:g\_\_Pyrodictium':0.0556268,RS\_GCF\_000015145.1:0.133854)0.905:0.0355706,((GB\_GCA\_003978665.1:0.234304,GB\_GCA\_013540595.1:0.1812)0.855:0.0367422,GB\_GCA\_013153105.1:0.14184)'0.678:g\_\_QNYQ01':0.02883)1.0:0.0994548,GB\_GCA\_013153145.1:0.235622)1.0:0.0707192,RS\_GCF\_000223395.1:0.245068)'1.0:f\_\_Pyrodictiaceae':0.137327)1.0:0.0606627)0.76:0.0297734)'1.0:o\_\_Sulfolobales':0.0621807,(GB\_GCA\_002254745.1:0.166335,GB\_GCA\_011375895.1:0.156348)'1.0:o\_\_EX4484-217-1;f\_\_EX4484-217-1':0.234649)1.0:0.0890444,(((GB\_GCA\_003019535.1:0.0112046,RS\_GCF\_902812505.1:0.0109385)'1.0:g\_\_ECH-B-1':0.283015,GB\_GCA\_003019595.1:0.269733)'1.0:f\_\_Marsarchaeaceae':0.370739,(GB\_GCA\_002507085.1:0.0238194,GB\_GCA\_011055275.1:0.0358303)'1.0:f\_\_UBA168;g\_\_UBA168':0.726108)'1.0:o\_\_Marsarchaeales':0.128953,((GB\_GCA\_000375685.1:0.260755,GB\_GCA\_000380705.1:0.228095)0.547:0.0545175,GB\_GCA\_011056475.1:0.255552)'1.0:o\_\_Gearchaeales;f\_\_Gearchaeaceae':0.439207)0.868:

0.0677825)0.888:0.0404393,((((((((((((((RS\_GCF\_000148385.1:0.00918663,GB\_GCA\_001316125.1:0.0232619)1.0:0.0161734,(GB\_GCA\_001316245.1:0.0318132,GB\_GCA\_002506645.1:0.0664222)0.989:0.0127752)0.6:0.00556245,(GB\_GCA\_001316005.1:0.027709,GB\_GCA\_001316285.1:0.0230894)0.7:0.0479023)0.969:0.0106289,(GB\_GCA\_001315985.1:0.00919554,GB\_GCA\_001316265.1:0.00722522)1.0:0.0390225)0.999:0.0190691,RS\_GCF\_000190315.1:0.0549597)0.679:0.0170497,(GB\_GCA\_001316025.1:0.0416606,GB\_GCA\_002496475.1:0.0423521)1.0:0.0572261)1.0:0.0276449,GB\_GCA\_001516765.1:0.0779425)'1.0:g\_\_Vulcanisaeta':0.0594024,RS\_GCF\_001748385.1:0.113532)1.0:0.152799,(((RS\_GCF\_000018305.1:0.0276203,GB\_GCA\_002506515.1:0.0425426)1.0:0.0692944,RS\_GCF\_001663375.1:0.0762846)'1.0:g\_\_Caldivirga':0.225798,((RS\_GCF\_001315925.1:0.0261594,GB\_GCA\_002508315.1:0.0301341)1.0:0.0844619,GB\_GCA\_001516585.1:0.119114)'1.0:g\_\_Thermocladium':0.269942)1.0:0.104039)0.954:0.0532992,(((GB\_GCA\_013153895.1:0.0309829,GB\_GCA\_013154355.1:0.0309525)1.0:0.0273717,GB\_GCA\_013153275.1:0.0584816)'1.0:g\_\_JAADER01':0.232153,GB\_GCA\_002254895.1:0.202709)0.999:0.0654834)'1.0:f\_\_Thermocladaceae':0.0711488,((((RS\_GCF\_000007225.1:0.0716895,RS\_GCF\_000234805.1:0.0810061)0.616:0.0164714,(RS\_GCF\_000016385.1:0.00843531,GB\_GCA\_000247545.1:0.00817235)1.0:0.0997817)0.983:0.0230358,((RS\_GCF\_000015205.1:0.0993974,RS\_GCF\_000019805.1:0.0896136)1.0:0.0336976,(GB\_GCA\_001189275.1:0.0105742,GB\_GCA\_009903905.1:0.0633679)1.0:0.0829621)0.949:0.0142738)1.0:0.0350642,GB\_GCA\_000015805.1:0.0936788)'1.0:g\_\_Pyrobaculum':0.15342,((((RS\_GCF\_002077075.2:0.00352967,GB\_GCA\_009903945.1:0.00443434)1.0:0.0544955,RS\_GCF\_000193375.1:0.0388324)1.0:0.0430362,GB\_GCA\_002497345.1:0.0927873)0.999:0.03533,RS\_GCF\_000253055.1:0.123333)1.0:0.0549704,GB\_GCA\_000960885.1:0.125562)'1.0:g\_\_Thermoproteus':0.110209)'1.0:f\_\_Thermoproteaceae':0.241459)1.0:0.178477,GB\_GCA\_003649205.1:0.296348)'1.0:o\_\_Thermoproteales':0.107429,((((((((RS\_GCF\_000015225.1:0.134573,RS\_GCF\_000813245.1:0.161249)'1.0:g\_\_Thermofilum\_B':0.103187,(RS\_GCF\_000993805.1:0.151493,GB\_GCA\_002855745.1:0.119706)'1.0:g\_\_Thermofilum\_A':0.114661)0.967:0.040331,(((GB\_GCA\_011047595.1:0.0697137,GB\_GCA\_011372985.1:0.0381894)0.959:0.0148832,GB\_GCA\_011363115.1:0.0459136)1.0:0.0890971,GB\_GCA\_011364825.1:0.181885)'1.0:g\_\_Thermofilum\_C':0.0925681)1.0:0.193966,(((GB\_GCA\_011053655.1:0.0148365,GB\_GCA\_011369665.1:0.0193275)1.0:0.0797114,(GB\_GCA\_011055445.1:0.0646717,GB\_GCA\_011372935.1:0.0537828)1.0:0.0482151)'1.0:g\_\_DRZQ01':0.123407,GB\_GCA\_003649495.1:0.149546)1.0:0.169408)'1.0:f\_\_Thermofilaceae':0.081062,GB\_GCA\_003649235.1:0.321312)0.99:0.0612658,GB\_GCA\_003649225.1:0.350361)0.982:0.046593,(((GB\_GCA\_003649515.1:0.174728,GB\_GCA\_003650675.1:0.196415)1.0:0.12704,GB\_GCA\_003650785.1:0.305682)'0.885:f\_\_B20-G17':0.0496606,GB\_GCA\_002254595.1:0.354237)0.819:0.0678944)1.0:0.0491428,(GB\_GCA\_003649445.1:0.0986002,GB\_GCA\_003650815.1:0.104313)'1.0:f\_\_B15-G2;g\_\_B15-G2':0.267384)'0.887:o\_\_Thermofilales':0.0480429)0.989:0.038424,(GB\_GCA\_003649665.1:0.220595,GB\_GCA\_003650925.1:0.214686)'1.0:o\_\_QMSL01;f\_\_QMSL01':0.167341)1.0:0.063963)'0.999:c\_\_Thermoproteia':0.0398798,((((((((GB\_GCA\_001717015.1:0.0408551,GB\_GCA\_004028775.1:0.0298926)1.0:0.0311928,GB\_GCA\_014361455.1:0.07651)'1.0:g\_\_Methanosuratus':0.148108,((GB\_GCA\_001717025.1:0.0669943,GB\_GCA\_001717035.1:0.0533075)1.0:0.152177,GB\_GCA\_011329225.1:0.155727)'1.0:g\_\_Methanomethylicus':0.0594703)1.0:0.116923,((GB\_GCA\_004347955.1:0.0130877,GB\_GCA\_011362965.1:0.0173656)0.986:0.0103001,GB\_GCA\_014361445.1:0.0180721)'1.0:g\_\_WYZ-LMO10':0.12292)1.0:0.102921,GB\_GCA\_004348015.1:0.184535)'1.0:f\_\_Methanomethylicaceae':0.195182,GB\_GCA\_003649085.1:0.284904)'1.0:o\_\_Methanomethylicales':0.130961,((((GB\_GCA\_011362155.1:0.0491463,GB\_GCA\_011369545.1:0.0681307)0.666:0.0137688,GB\_GCA\_011605835.1:0.0493138)1.0:0.0510583,GB\_GCA\_004347965.1:0.108342)1.0:0.0470301,GB\_GCA\_003649565.1:0.100724)0.979:0.0458878,GB\_GCA\_003650865.1:0.140357)'1.0:f\_\_WYZ-LMO8;g\_\_WYZ-LMO8':0.27956,((GB\_GCA\_003649615.1:0.151594,GB\_GCA\_011375665.1:0.196876)'1.0:f\_\_B40-G2':0.127408,GB\_GCA\_011364865.1:0.324763)1.0:0.103988)'1.0:o\_\_Nezhaarchaeales':0.0963609)0.048:0.0297805,((((GB\_GCA\_011370515.1:0.00239089,GB\_GCA\_011605825.1:0.00734848)1.0:0.049

9465,GB\_GCA\_011372955.1:0.0400317)1.0:0.09193,GB\_GCA\_011367155.1:0.140986)'1.0:f\_DSZF01 ;g\_DSZF01':0.188105,GB\_GCA\_003649185.1:0.211664)0.997:0.0616293,(GB\_GCA\_003649145.1:0.0 727549,GB\_GCA\_003650625.1:0.0686876)'1.0:f\_B29-G17;g\_B29-G17':0.13545)'1.0:o\_B29- G17':0.132883,GB\_GCA\_011362245.1:0.514233)0.991:0.0558243)'1.0:c\_Methanomethylia':0.038 6064)1.0:0.0590834)0.909:0.0352702,((((((RS\_GCF\_000019605.1:0.0215259,GB\_GCA\_011056255.1: 0.0215464)1.0:0.0975712,GB\_GCA\_003344655.1:0.110434)'1.0:g\_Korarchaeum':0.230394,RS\_GCF\_ 003947435.1:0.356009)0.994:0.0640975,GB\_GCA\_011042755.1:0.303762)'0.997:f\_Korarchaeaceae' :0.067022,(GB\_GCA\_003661265.1:0.0590471,GB\_GCA\_003661365.1:0.0909001)'1.0:f\_QMVU01;g\_ QMVU01':0.282204)1.0:0.191393,GB\_GCA\_003661385.1:0.503688)'1.0:o\_Korarchaeales':0.17398 8,GB\_GCA\_011041895.1:0.587591)'1.0:c\_Korarchaeia':0.0777545)'1.0:p\_Thermoproteota':0.0499 309,((((((((((((((GB\_GCA\_013375475.1:0.0508308,GB\_GCA\_013375495.1:0.0515576)1.0:0.0233108,G B\_GCA\_011364925.1:0.0855293)1.0:0.0322389,GB\_GCA\_004375715.1:0.113981)1.0:0.0417026,GB\_ GCA\_005222975.1:0.0960548)1.0:0.0503401,GB\_GCA\_004524725.1:0.189414)0.959:0.0254441,GB\_ GCA\_011364975.1:0.166235)1.0:0.0444622,(GB\_GCA\_005223125.1:0.0708932,GB\_GCA\_013375485. 1:0.0542086)1.0:0.100866)'0.999:g\_SOKP01':0.0420582,((GB\_GCA\_004524385.1:0.0241179,GB\_GC A\_004524535.1:0.0289717)1.0:0.13623,(GB\_GCA\_004524425.1:0.141419,GB\_GCA\_004524515.1:0.1 32909)0.0:0.0253125)'1.0:g\_SDNM01':0.0410136)1.0:0.0700794,((GB\_GCA\_004524365.1:0.162613, GB\_GCA\_008080765.1:0.160892)1.0:0.047894,GB\_GCA\_008080735.1:0.138784)'1.0:g\_TEKIR- 8':0.0736804)'1.0:f\_SOKP01':0.266149,(GB\_GCA\_004524545.1:0.398333,RS\_GCF\_008000775.1:0.38 0467)'1.0:f\_AMARA-1':0.144072)0.946:0.0708222,GB\_GCA\_001940655.1:0.45791)'1.0:o\_CR- 4':0.213388,(((GB\_GCA\_013375405.1:0.0920152,GB\_GCA\_013375455.1:0.0957808)1.0:0.0600245,G B\_GCA\_005191415.1:0.0984183)'1.0:f\_HEL-GB-A;g\_HEL-GB- A':0.231224,(GB\_GCA\_011365055.1:0.367901,GB\_GCA\_013375355.1:0.328392)1.0:0.0987039)0.999 :0.0724461,GB\_GCA\_005191425.1:0.454556)'1.0:o\_Helarchaeales':0.0940989)'0.958:c\_Lokiarchae ia':0.0537259,((((((((((GB\_GCA\_001563335.1:0.0400922,GB\_GCA\_002825515.1:0.0446196)1.0:0.0323 418,(GB\_GCA\_001940705.1:0.0547159,GB\_GCA\_011364905.1:0.0988713)0.997:0.0207203)1.0:0.032 5259,GB\_GCA\_004376265.1:0.090753)'1.0:g\_SMTZ1- 45':0.0487061,(((GB\_GCA\_002825465.1:0.0107313,GB\_GCA\_002825535.1:0.0118333)1.0:0.0673138, GB\_GCA\_004524565.1:0.07903)1.0:0.0481879,(GB\_GCA\_003345545.1:0.143639,GB\_GCA\_00452459 5.1:0.108551)0.405:0.0232479)'1.0:g\_MP8T- 1':0.0359363)1.0:0.0696589,((GB\_GCA\_011364985.1:0.0615333,GB\_GCA\_011365025.1:0.0552635)1. 0:0.0979461,GB\_GCA\_001563325.1:0.12165)'1.0:g\_SMTZ1- 83':0.0422493)0.94:0.02211,GB\_GCA\_013138615.1:0.179827)0.988:0.023439,((GB\_GCA\_004524445. 1:0.203091,GB\_GCA\_008080745.1:0.178617)0.937:0.0300781,GB\_GCA\_004524435.1:0.201359)0.98 2:0.0254747)0.985:0.0222144,((GB\_GCA\_003345555.1:0.118058,GB\_GCA\_003345595.1:0.116135)'1. 0:g\_OW5':0.0966961,GB\_GCA\_013388835.1:0.215963)1.0:0.0423069)0.864:0.032795,GB\_GCA\_00 3662765.1:0.124647)'1.0:c\_Thorarchaeia;o\_Thorarchaeales;f\_Thorarchaeaceae':0.473224)0.944: 0.0419511,((GB\_GCA\_011362025.1:0.0759955,GB\_GCA\_011364305.1:0.0566994)'1.0:c\_DTBI01;o\_ DTBI01;f\_DTBI01;g\_DTBI01':0.3803,GB\_GCA\_001940665.1:0.468218)0.671:0.0557708)0.985:0.036 2071,((((GB\_GCA\_001940755.1:0.0754379,GB\_GCA\_002505645.1:0.0608921)1.0:0.107419,GB\_GCA \_013166775.1:0.143592)'1.0:o\_UBA460;f\_UBA460;g\_UBA460':0.365073,(GB\_GCA\_001940725.1: 0.3126,GB\_GCA\_002728275.1:0.317469)'1.0:o\_LC-2;f\_LC- 2':0.351819)1.0:0.115353,GB\_GCA\_013166835.1:0.546294)0.973:0.0593404,((GB\_GCA\_003144275.1 :0.19517,GB\_GCA\_011364965.1:0.188269)'1.0:f\_B3-JM-08;g\_B3-JM- 08':0.313213,GB\_GCA\_001940645.1:0.558601)'1.0:o\_LC- 3':0.225831)'1.0:c\_Heimdallarchaeia':0.111926)'1.0:p\_Asgardarchaeota':0.0592267)1.0:0.0777952 )0.995:0.047286,((((GB\_GCA\_003663045.1:0.147869,GB\_GCA\_903930485.1:0.273701)1.0:0.083238 7,(GB\_GCA\_003663115.1:0.179315,GB\_GCA\_003663175.1:0.239032)0.979:0.0458085)0.895:0.03717



61,(GB\_GCA\_002254405.1:0.167711,GB\_GCA\_002254565.1:0.134097)'1.0:g\_\_EX4484-  
2':0.236445)'1.0:f\_\_QMZM01':0.0544116,(((GB\_GCA\_001723835.1:0.0925582,GB\_GCA\_001723855.  
1:0.0342431)'1.0:g\_\_WOR-SM1-SCG':0.248438,GB\_GCA\_001723845.1:0.284548)'1.0:f\_\_WOR-SM1-  
SCG':0.0752851,GB\_GCA\_001742785.1:0.403922)0.994:0.0423213)0.807:0.0455816,((GB\_GCA\_0004  
02775.1:0.333653,GB\_GCA\_011380095.1:0.37914)0.761:0.0588986,GB\_GCA\_902384455.1:0.433123  
)'1.0:f\_\_SCGC-AAA252-  
115':0.104269)'1.0:o\_\_IMC4':0.0953698,((GB\_GCA\_001873845.1:0.0815864,GB\_GCA\_002083985.1:0  
.0598198)0.996:0.0392134,GB\_GCA\_002841105.1:0.0593823)'1.0:o\_\_Altarchaeales;f\_\_Altarchaeae  
ae;g\_\_Altarchaeum':0.553157)'1.0:p\_\_Altarchaeota;c\_\_Altarchaeia':0.189482)0.995:0.0495342,((((  
((((GB\_GCA\_013425375.1:0.148967,GB\_GCA\_902386555.1:0.166784)1.0:0.0652252,GB\_GCA\_9038  
35325.1:0.220965)'1.0:g\_\_CAILMU01':0.095976,GB\_GCA\_903835385.1:0.285348)1.0:0.0610463,((GB  
\_GCA\_011358535.1:0.12503,GB\_GCA\_013425425.1:0.150325)'1.0:g\_\_JACCLJ01':0.106982,GB\_GCA\_  
011358475.1:0.292678)1.0:0.0748057)1.0:0.063705,GB\_GCA\_013331535.1:0.343782)1.0:0.107594,((  
GB\_GCA\_013425455.1:0.0296454,GB\_GCA\_903920925.1:0.032562)'1.0:g\_\_CAIXOA01':0.256206,GB\_  
GCA\_903828955.1:0.289766)1.0:0.158927)'0.998:f\_\_UBA10214':0.0650934,(((GB\_GCA\_011380495.1  
:0.480269,GB\_GCA\_013153395.1:0.294926)'1.0:g\_\_JAADEL01':0.310099,GB\_GCA\_003694965.1:0.49  
0141)1.0:0.117006,GB\_GCA\_011362975.1:0.328145)'1.0:f\_\_J096':0.124504)1.0:0.123112,((((((GB\_G  
CA\_902384555.1:0.165707,GB\_GCA\_903923795.1:0.159197)'1.0:g\_\_CAIXYX01':0.163157,GB\_GCA\_0  
02778455.1:0.292976)0.704:0.0848487,GB\_GCA\_011334515.1:0.427466)1.0:0.126311,((GB\_GCA\_01  
3331805.1:0.186934,GB\_GCA\_903892905.1:0.200576)'1.0:g\_\_UBA10161':0.186638,GB\_GCA\_90238  
4585.1:0.305099)0.999:0.0746706)'0.992:f\_\_UBA10161':0.0560579,GB\_GCA\_001871475.1:0.411997  
)0.977:0.0536797,GB\_GCA\_001871535.1:0.635166)0.786:0.0351844)'1.0:o\_\_UBA10214':0.0629643,(  
((((GB\_GCA\_013425335.1:0.0526063,GB\_GCA\_013425405.1:0.0557959)1.0:0.0772505,GB\_GCA\_013  
426015.1:0.108129)'1.0:g\_\_Sv326':0.0711198,GB\_GCA\_011335015.1:0.104295)'1.0:f\_\_DTGH01':0.24  
8925,((GB\_GCA\_903884505.1:0.151278,GB\_GCA\_903921825.1:0.188549)1.0:0.0758985,GB\_GCA\_01  
1358645.1:0.194947)'1.0:f\_\_DTNL01':0.181969)'1.0:o\_\_DTNL01':0.0610889,((GB\_GCA\_003660965.1:  
0.180912,GB\_GCA\_902386535.1:0.172925)'1.0:o\_\_B9-G16;f\_\_B9-  
G16':0.253049,GB\_GCA\_902384795.1:0.446593)0.921:0.0593739)1.0:0.057974)0.911:0.0413876,((G  
B\_GCA\_011332735.1:0.232267,GB\_GCA\_902385155.1:0.251117)'1.0:o\_\_CABMEP01;f\_\_CABMEP01':  
0.340617,(GB\_GCA\_011389055.1:0.11209,GB\_GCA\_903832205.1:0.15308)'1.0:o\_\_CAILAH01;f\_\_CAIL  
AH01;g\_\_CAILAH01':0.489511)0.967:0.0600638)0.645:0.0339397,(((GB\_GCA\_001889985.1:0.33647  
1,GB\_GCA\_002501775.1:0.273324)0.967:0.0618917,RS\_GCF\_002214165.1:0.387245)1.0:0.0880675,(  
GB\_GCA\_013330215.1:0.23601,GB\_GCA\_903858385.1:0.263586)0.978:0.0484265,GB\_GCA\_903884  
115.1:0.332681)1.0:0.0796736)1.0:0.132991,GB\_GCA\_902385515.1:0.437043)'1.0:o\_\_Micrarchaeale  
s;f\_\_Micrarchaeaceae':0.328833)1.0:0.0597563,((((((GB\_GCA\_002499405.1:0.378197,GB\_GCA\_0027  
92915.1:0.32373)1.0:0.122299,(GB\_GCA\_002763345.1:0.0641344,GB\_GCA\_902384935.1:0.0731052)  
'1.0:g\_\_0-14-0-20-59-  
11':0.286948)'0.959:f\_\_UBA93':0.0540371,GB\_GCA\_903893865.1:0.449053)0.933:0.0525407,(GB\_G  
CA\_013331595.1:0.368024,GB\_GCA\_013360305.1:0.367664)'1.0:f\_\_UBA10210':0.0974901)1.0:0.056  
8611,(((GB\_GCA\_001871495.1:0.188082,GB\_GCA\_013425325.1:0.134757)'1.0:f\_\_UBA8480;g\_\_UBA8  
480':0.227725,GB\_GCA\_011358415.1:0.577421)1.0:0.07497,(GB\_GCA\_001871595.1:0.480109,GB\_G  
CA\_005239845.1:0.390152)0.988:0.0601887)0.858:0.0418167)0.979:0.0471072,(GB\_GCA\_90238504  
5.1:0.635655,GB\_GCA\_903851445.1:0.458433)0.687:0.0682135)'1.0:o\_\_UBA8480':0.207024)'1.0:p\_  
\_Micrarchaeota;c\_\_Micrarchaeia':0.133777,((((((((((GB\_GCA\_002499505.1:0.000376093,GB\_GCA\_  
002687735.1:6e-  
09)1.0:0.0972732,bin.647:0.100169):0.0981818,GB\_GCA\_002762975.1:0.242448)'0.973:g\_\_UBA493'  
:0.0456297,GB\_GCA\_000402355.1:0.206861)0.272:0.0317821,((GB\_GCA\_005239615.1:0.166295,GB  
\_GCA\_902386385.1:0.189585)1.0:0.108254,GB\_GCA\_013331625.1:0.226172)'1.0:g\_\_UBA10205':0.0

545359)'1.0:f\_\_lainarchaeaceae':0.165102,GB\_GCA\_000830275.1:0.295413)0.309:0.0533629,GB\_GC  
A\_013331455.1:0.410481)1.0:0.0767796,(GB\_GCA\_002763225.1:0.401663,GB\_GCA\_013331925.1:0.  
413446)0.932:0.0607307)0.811:0.0399143,(((GB\_GCA\_002779065.1:0.40888,(GB\_GCA\_011334955.1:  
0.36564,bin.350:0.373148):0.0990482)0.999:0.0804978,GB\_GCA\_002688035.1:0.371361)0.898:0.04  
66289)0.999:0.059417,(((GB\_GCA\_002068885.1:0.184063,GB\_GCA\_902385225.1:0.200654)1.0:0.09  
13761,GB\_GCA\_012799645.1:0.221159)'1.0:f\_\_JAAZKV01;g\_\_JAAZKV01':0.0560695,bin.104:0.31078  
4):0.278732)'0.999:o\_\_lainarchaeales':0.0720408,((GB\_GCA\_002779075.1:0.164309,GB\_GCA\_90391  
6665.1:0.173327)'1.0:f\_\_0-14-0-20-30-16;g\_\_0-14-0-20-30-  
16':0.62513,(GB\_GCA\_003559395.1:0.340589,GB\_GCA\_009392915.1:0.317833)'1.0:f\_\_CSSED10-  
239':0.40133)'0.976:o\_\_0-14-0-20-30-  
16':0.10477)1.0:0.113667,(GB\_GCA\_013154035.1:0.356126,GB\_GCA\_013154145.1:0.346339)'1.0:o\_\_  
\_JAADDC01;f\_\_JAADDC01':0.31227)1.0:0.0750434,(((GB\_GCA\_003551125.1:0.13935,GB\_GCA\_00355  
3825.1:0.168774)'1.0:g\_\_B1Sed10-29':0.166784,GB\_GCA\_003558235.1:0.29543)'1.0:f\_\_B1Sed10-  
29':0.285605,GB\_GCA\_003660975.1:0.436658)'1.0:o\_\_B1Sed10-  
29':0.176694)'0.544:p\_\_lainarchaeota;c\_\_lainarchaeia':0.041542)1.0:0.0535239)0.955:0.0352083,(((  
GB\_GCA\_002495465.1:0.0243112,GB\_GCA\_014189675.1:0.0181501)1.0:0.0441479,GB\_GCA\_002687  
935.1:0.0587439)'1.0:f\_\_Undinarchaeaceae;g\_\_Undinarchaeum':0.375487,GB\_GCA\_002502135.1:0.  
375975)0.996:0.0715162,GB\_GCA\_014189685.1:0.362393)'1.0:p\_\_Undinarchaeota;c\_\_Undinarchaei  
a;o\_\_Undinarchaeales':0.293043)1.0:0.0422431,((((((((((((((((GB\_GCA\_003560545.1:0.0924429,GB  
\_GCA\_003562145.1:0.0817593)0.0:0.0171405,GB\_GCA\_007131205.1:0.0591036)'1.0:g\_\_PWWA01':  
0.19744,(GB\_GCA\_002762915.1:0.241499,GB\_GCA\_903891505.1:0.295191)'0.998:g\_\_21-14-0-10-  
32-  
9':0.0646575)0.78:0.0513523,((GB\_GCA\_007116295.1:0.293486,GB\_GCA\_007117755.1:0.305851)'0.  
813:g\_\_SKIS01':0.0483479,GB\_GCA\_007117145.1:0.296104)1.0:0.092188)'1.0:f\_\_21-14-0-10-32-  
9':0.16347,((((GB\_GCA\_013202845.1:8.53103e-06,bin.69:6.11352e-  
06):0.139763,GB\_GCA\_014384375.1:0.132539)1.0:0.047998,GB\_GCA\_002686295.1:0.236095)1.0:0.0  
605243,GB\_GCA\_014384455.1:0.194199)'1.0:f\_\_GCA-2686295;g\_\_GCA-  
2686295':0.161087,(GB\_GCA\_001595785.1:0.139118,GB\_GCA\_011372335.1:0.11157)'1.0:f\_\_SM23-  
78;g\_\_SM23-  
78':0.232422)0.999:0.051677)0.458:0.0300497,((GB\_GCA\_011329125.1:0.123152,GB\_GCA\_0133305  
95.1:0.157884)'1.0:g\_\_UBA9642':0.256357,GB\_GCA\_003599145.1:0.39194)'1.0:f\_\_UBA9642':0.0911  
536)0.0:0.0163775,((((GB\_GCA\_002498125.1:0.174454,GB\_GCA\_013331575.1:0.19223)'1.0:g\_\_UBA  
525':0.25408,(GB\_GCA\_002503705.1:0.277599,GB\_GCA\_003694385.1:0.264822)'1.0:g\_\_UBA153':0.  
169074)'1.0:f\_\_UBA525':0.0850811,GB\_GCA\_007117735.1:0.476827)0.0:0.0376805,((GB\_GCA\_0071  
16645.1:0.100142,GB\_GCA\_007128245.1:0.0903601)1.0:0.222851,GB\_GCA\_007117065.1:0.36062)'1  
.0:f\_\_SKIA01;g\_\_SKIA01':0.293086)0.983:0.0506458,(GB\_GCA\_002685855.1:0.404097,GB\_GCA\_0036  
94805.1:0.435294)0.994:0.0739742)1.0:0.0524383)1.0:0.07304,(((GB\_GCA\_000830295.1:0.228902,G  
B\_GCA\_013335235.1:0.272571)1.0:0.193234,GB\_GCA\_003564925.1:0.336959)0.994:0.0570221,(GB  
\_GCA\_002762705.1:0.465755,GB\_GCA\_002867475.1:0.41059)0.982:0.0716981)0.973:0.0401993)0.9  
87:0.035982,((((GB\_GCA\_013203345.1:6.76572e-06,bin.595:6.11352e-  
06):0.221692,GB\_GCA\_013331125.1:0.26732)1.0:0.121128,GB\_GCA\_003695435.1:0.442464)'1.0:f\_\_  
UBA11576':0.0889473,(GB\_GCA\_002762985.1:0.309061,GB\_GCA\_013331695.1:0.409153)'1.0:f\_\_UB  
A12501':0.0941639)0.34:0.0303446,(((GB\_GCA\_903904885.1:0.343512,GB\_GCA\_903907555.1:0.33  
8027)0.853:0.0454285,GB\_GCA\_903842985.1:0.304025)'1.0:f\_\_CAIVOO01':0.0956074,GB\_GCA\_013  
331965.1:0.507916)0.974:0.0346193,GB\_GCA\_003650545.1:0.425337)0.996:0.0423756)1.0:0.03487  
86)0.655:0.0230362,((((GB\_GCA\_002686855.1:0.157678,GB\_GCA\_002688925.1:0.191728)1.0:0.122  
975,(GB\_GCA\_002688775.1:0.246619,GB\_GCA\_013330825.1:0.396421)0.416:0.0541067)'1.0:f\_\_GW  
2011-

AR4':0.097858,((GB\_GCA\_002687795.1:0.315374,(GB\_GCA\_005222965.1:0.290266,bin.78:0.32753):0.0314072)'0.999:f\_\_GCA-2687795':0.0574163,GB\_GCA\_013329175.1:0.46828)0.958:0.0487789)0.994:0.038818,(((GB\_GCA\_002762865.1:0.0664961,bin.482:0.0706623):0.100304,GB\_GCA\_003561825.1:0.269421)'1.0:f\_\_CG1-02-33-12':0.169242,GB\_GCA\_013329045.1:0.526027)0.79:0.0422758)0.946:0.0289018,(((GB\_GCA\_003695265.1:0.324396,GB\_GCA\_013331615.1:0.402894)0.935:0.0470921,((GB\_GCA\_013152815.1:0.381909,bin.101:0.322798):0.0614523,((GB\_GCA\_013202955.1:5.02714e-06,bin.305:6.11352e-06):0.197745,bin.458:0.177167):0.131709)0.942:0.0564028)0.969:0.0339753,(GB\_GCA\_003695045.1:0.39089,GB\_GCA\_011368255.1:0.431028)0.999:0.0582598)0.996:0.03729)1.0:0.0358123)0.991:0.030582,(((((((GB\_GCA\_002762795.1:0.319292,GB\_GCA\_902385765.1:0.234166)0.73:0.0628676,(GB\_GCA\_003599055.1:0.260962,GB\_GCA\_003694525.1:0.255498)0.987:0.0688723)1.0:0.132921,GB\_GCA\_011331795.1:0.406898)0.905:0.0569497,GB\_GCA\_002687275.1:0.502226)'0.995:f\_\_ARS49':0.0689467,GB\_GCA\_001871415.1:0.616587)0.554:0.0389737,GB\_GCA\_003648985.1:0.466302)0.74:0.0292533,(((GB\_GCA\_002688315.1:0.107539,bin.219:0.121932):0.175523,GB\_GCA\_013331515.1:0.362831)'1.0:f\_\_UBA10216':0.139781,GB\_GCA\_002763335.1:0.454005)1.0:0.0695753)0.948:0.0375738,GB\_GCA\_002779235.1:0.519237)0.0:0.0254134)0.954:0.0296253,((GB\_GCA\_002505945.1:0.48313,GB\_GCA\_011045925.1:0.499384)'1.0:f\_\_UBA119':0.124848,(GB\_GCA\_003650585.1:0.217482,GB\_GCA\_903915225.1:0.254754)'1.0:f\_\_B29-G15;g\_\_B29-G15':0.277784)1.0:0.081894)0.912:0.035407,(((((((GB\_GCA\_002686315.1:0.00158191,GB\_GCA\_013330875.1:0.00667316)1.0:0.254673,GB\_GCA\_002762785.1:0.199419)'1.0:g\_\_UBA11998':0.0731644,(GB\_GCA\_002763025.1:0.0883453,(GB\_GCA\_013204355.1:9.7929e-06,bin.502:6.11352e-06):0.0802137)'1.0:g\_\_1-14-0-10-32-24':0.207946)0.755:0.0309912,((GB\_GCA\_002762845.1:0.232294,GB\_GCA\_002792115.1:0.231293)0.998:0.0486641,(GB\_GCA\_013331555.1:0.299518,GB\_GCA\_013331635.1:0.251439)0.99:0.0544134)0.62:0.0273442)1.0:0.0907686,((GB\_GCA\_002688265.1:0.337154,GB\_GCA\_902529885.1:0.507602)1.0:0.052789,bin.210:0.269132):0.051479)0.813:0.05373,GB\_GCA\_002687775.1:0.383459)'1.0:f\_\_GW2011-AR9':0.213954)'1.0:o\_\_Woeseearchaeales':0.0632696,((((((((((((((((GB\_GCA\_002762735.1:0.112412,GB\_GCA\_009992175.1:0.132835)1.0:0.128468,GB\_GCA\_009992215.1:0.224121)0.998:0.0616206,GB\_GCA\_903831045.1:0.272924)'0.99:g\_\_GW2011-AR1':0.0517912,(GB\_GCA\_002254395.1:0.165178,bin.179:0.143965):0.115795)0.999:0.0545535,GB\_GCA\_000806015.1:0.288356)0.988:0.0383129,(GB\_GCA\_002069705.1:0.270553,GB\_GCA\_013329055.1:0.267432)0.203:0.0357721)0.988:0.0296906,(((GB\_GCA\_002689985.1:0.115402,GB\_GCA\_002731115.1:0.096369)'1.0:g\_\_NP1466':0.0957638,GB\_GCA\_002897655.1:0.181896)1.0:0.0414285,bin.50:0.170457):0.0382334,(GB\_GCA\_000405225.1:0.287878,GB\_GCA\_002686355.1:0.263572)0.969:0.0508861)0.94:0.0276902)0.851:0.0263836,((GB\_GCA\_001786415.1:0.163193,GB\_GCA\_902386025.1:0.18605)0.13:0.053332,GB\_GCA\_012798335.1:0.304791)'1.0:g\_\_RBG-13-33-26':0.0645703)0.86:0.0297375,GB\_GCA\_902385635.1:0.376369)0.52:0.0323553,GB\_GCA\_002763085.1:0.343383)'1.0:f\_\_GW2011-AR1':0.110153,(GB\_GCA\_001872185.1:0.264784,(GB\_GCA\_002763155.1:0.239249,bin.77:0.256726):0.0411025)'1.0:f\_\_PFCU01;g\_\_PFCU01':0.173328)0.982:0.0422302,(((((((GB\_GCA\_002688335.1:0.193618,GB\_GCA\_002688875.1:0.235086)0.968:0.058776,GB\_GCA\_002688165.1:0.210983)'1.0:g\_\_ARS1285':0.0526362,bin.129:0.21236):0.0429659,(GB\_GCA\_011333975.1:0.223259,GB\_GCA\_902385625.1:0.213063)0.0:0.0491291)1.0:0.116092,GB\_GCA\_903866625.1:0.36895)'0.922:f\_\_ARS1285':0.0513646,GB\_GCA\_001786395.1:0.366512)1.0:0.0485226,(((((((GB\_GCA\_002688415.1:0.319675,GB\_GCA\_003693875.1:0.351904)0.993:0.0697608,GB\_GCA\_002690445.1:0.245712)0.0:0.0409621,GB\_GCA\_903828655.1:0.268559)1.0:0.0553806,bin.665:0.277854):0.0542424,GB\_GCA\_902385655.1:0.348316)'

1.0:f\_\_ARS1160':0.176781)0.709:0.0313681)0.828:0.0310766,((((GB\_GCA\_002496015.1:0.316236,GB\_GCA\_003694055.1:0.38418)0.927:0.0595321,(GB\_GCA\_002686195.1:0.246767,GB\_GCA\_002688015.1:0.285517)0.847:0.0643685)0.999:0.0507597,((GB\_GCA\_009694725.1:0.407663,GB\_GCA\_903873955.1:0.31472)1.0:0.105192,(GB\_GCA\_002687255.1:0.336217,bin.498:0.259664):0.0996205)0.219:0.048513)1.0:0.0422508,((((GB\_GCA\_002497285.1:0.18485,GB\_GCA\_002792635.1:0.210682)0.724:0.0443288,GB\_GCA\_001872315.1:0.201904)1.0:0.104336,GB\_GCA\_002763075.1:0.295748)0.112:0.0483861,(GB\_GCA\_004195435.1:0.294397,GB\_GCA\_009694755.1:0.367912)0.998:0.0626681)0.993:0.0483174)'1.0:f\_\_UBA73':0.12934,GB\_GCA\_003554465.1:0.606219)0.852:0.0472784)0.872:0.0339318,GB\_GCA\_002763035.1:0.499758)1.0:0.0954292,((((GB\_GCA\_002499185.1:0.390151,GB\_GCA\_011371765.1:0.273333)0.663:0.0535915,GB\_GCA\_002254805.1:0.341944)0.982:0.0642366,GB\_GCA\_002763115.1:0.482321)0.994:0.0549179,(GB\_GCA\_002780285.1:0.48178,GB\_GCA\_011362825.1:0.405282)0.582:0.0556056)0.827:0.0483166)1.0:0.107181,GB\_GCA\_013331945.1:0.510053)'1.0:o\_\_Pacearcaeales':0.165817,((((GB\_GCA\_002687825.1:0.141919,GB\_GCA\_002688395.1:0.153936)'1.0:f\_\_ARS1403;g\_\_ARS1403':0.215277,GB\_GCA\_002688095.1:0.382427)0.732:0.0611504,GB\_GCA\_000402515.1:0.391888)1.0:0.0906795,GB\_GCA\_002687815.1:0.390336)0.872:0.0382406,((((GB\_GCA\_003694495.1:0.326197,GB\_GCA\_013329215.1:0.388277)0.949:0.0718242,((GB\_GCA\_009691355.1:0.136683,GB\_GCA\_013331795.1:0.0992516)'1.0:g\_\_GW2011-AR17':0.239537,bin.391:0.353132):0.00700996,bin.497:0.298938):0.102904)'1.0:f\_\_GW2011-AR17':0.032589,bin.185:0.376582):0.079245,GB\_GCA\_002505585.1:0.505587)0.885:0.0400909)0.792:0.0310463,((((GB\_GCA\_000830315.1:0.326724,GB\_GCA\_002688355.1:0.386964)'1.0:f\_\_GW2011-AR20':0.0480021,bin.683:0.395898):0.0425888,GB\_GCA\_000806155.1:0.514787)0.962:0.0388706,(GB\_GCA\_002687185.1:0.622681,((GB\_GCA\_013824915.1:0.321008,bin.312:0.3511):0.0782343,bin.300:0.345386):0.0366459)0.243:0.0508202,GB\_GCA\_002688325.1:0.456253)0.863:0.0406554)0.982:0.043936)'1.0:o\_\_SCGC-AAA011-G17':0.0562115)0.234:0.0488884)0.995:0.0562356,((GB\_GCA\_002506365.1:0.0746773,GB\_GCA\_013215525.1:0.0974642)'1.0:g\_\_UBA583':0.280813,GB\_GCA\_007117405.1:0.225443)0.727:0.0576967,GB\_GCA\_002505525.1:0.310497)'1.0:o\_\_UBA583;f\_\_UBA583':0.604167)0.897:0.0392991,((((GB\_GCA\_002686215.1:0.00113887,GB\_GCA\_002725495.1:0.000940365)1.0:0.336306,GB\_GCA\_014239585.1:0.210897)'0.998:g\_\_ARS21':0.104504,GB\_GCA\_014240455.1:0.277121)'1.0:f\_\_ARS21':0.302932,bin.525:0.530112):0.0720123,((GB\_GCA\_011333955.1:0.341221,GB\_GCA\_903864915.1:0.293717)1.0:0.130968,GB\_GCA\_013331935.1:0.392562)'1.0:f\_\_UBA10117':0.170929)'1.0:o\_\_UBA10117':0.185074)0.204:0.0297555,((((GB\_GCA\_000387965.1:0.0191639,GB\_GCA\_003086415.1:0.0116131)0.946:0.0140543,GB\_GCA\_001552015.1:0.0298617)'1.0:g\_\_Nanopusillus':0.318205,GB\_GCA\_003568775.1:0.271724)1.0:0.0885185,GB\_GCA\_011331665.1:0.224009)'1.0:f\_\_Nanopusillaceae':0.247115,GB\_GCA\_000008085.1:0.492661)'1.0:o\_\_Nanoarchaeales':0.283324)0.262:0.0327501,((((GB\_GCA\_003563585.1:0.0646535,GB\_GCA\_007133845.1:0.0702747)'1.0:g\_\_CSSed11-243R1':0.317914,GB\_GCA\_011333755.1:0.4026)'1.0:o\_\_CSSed11-243R1;f\_\_CSSed11-243R1':0.181561,(GB\_GCA\_003660925.1:0.437433,GB\_GCA\_011366705.1:0.532789)0.887:0.0587614)0.711:0.0451485,((GB\_GCA\_002502045.1:0.13486,GB\_GCA\_002503215.1:0.171276)'1.0:o\_\_Parvarchaeales;f\_\_Parvarchaeaceae;g\_\_Parvarchaeum':0.704871,(GB\_GCA\_002779595.1:0.320986,GB\_GCA\_902385255.1:0.309664)'1.0:o\_\_CG07-land;f\_\_CG07-land':0.314931)0.978:0.0806575)0.497:0.0419122,GB\_GCA\_002763265.1:0.72237)0.999:0.0657103)'1.0:p\_\_Nanoarchaeota;c\_\_Nanoarchaeia':0.0578099,(GB\_GCA\_002789275.1:1.01115,GB\_GCA\_011049195.1:0.82357)0.445:0.074926)0.995:0.0433331)1.0:0.0553078,((((((GB\_GCA\_001563915.1:0.0774846,GB\_GCA\_001564035.1:0.0755529)1.0:0.114873,GB\_GCA\_001564145.1:0.132415)'1.0:g\_\_B1-Br10-U2g21':0.144816,(GB\_GCA\_001761425.1:0.194014,RS\_GCF\_009617975.1:0.182052)'0.968:g\_\_SG9':0.0435472)0.925:0.0267863,(GB\_GCA\_000220375.1:0.291687,RS\_GCF\_013343275.1:0.172733)0.622:

0.0366728)0.998:0.0347165,(((GB\_GCA\_001563995.1:0.176763,GB\_GCA\_014297435.1:0.15311)'1.0:  
g\_\_PL-Br10-  
U2g16':0.0541217,(GB\_GCA\_003009795.1:0.0392905,GB\_GCA\_003009815.1:0.0278524)'1.0:g\_\_SW-  
4-43-  
9':0.157979)0.986:0.0359524,(GB\_GCA\_001563875.1:0.109332,GB\_GCA\_001563905.1:0.0996781)'1.  
0:g\_\_B1-Br10-  
U2g19':0.100462)1.0:0.0452103)1.0:0.0921253,GB\_GCA\_000220355.1:0.392016)'1.0:p\_\_Nanohaloar  
chaeota;c\_\_Nanosalinia;o\_\_Nanosalinales;f\_\_Nanosalinaceae':0.506807,(((GB\_GCA\_003660865.1:0.  
371211,GB\_GCA\_013139905.1:0.418459)'0.996:f\_\_B79-  
G9':0.0584236,GB\_GCA\_902384675.1:0.429586)0.982:0.0777115,(GB\_GCA\_013138765.1:0.154663,  
GB\_GCA\_013138805.1:0.170659)'1.0:f\_\_GLR71;g\_\_GLR71':0.37057)0.999:0.071884,((GB\_GCA\_0022  
54415.1:0.245658,GB\_GCA\_003660905.1:0.203946)'1.0:f\_\_EX4484-52;g\_\_EX4484-  
52':0.469658,GB\_GCA\_013153555.1:0.608012)0.994:0.0795926)'1.0:p\_\_EX4484-52;c\_\_EX4484-  
52;o\_\_EX4484-  
52':0.0882774)1.0:0.0609488)0.99:0.0430421,((((GB\_GCA\_003553905.1:0.131857,GB\_GCA\_003554  
845.1:0.130922)1.0:0.0493363,GB\_GCA\_003555465.1:0.142791)1.0:0.0595071,GB\_GCA\_003550625.  
1:0.172331)0.953:0.0455079,GB\_GCA\_003554235.1:0.144539)'1.0:f\_\_PWEA01;g\_\_PWEA01':0.35058  
5,GB\_GCA\_003663345.1:0.326329)'1.0:p\_\_PWEA01;c\_\_PWEA01;o\_\_PWEA01':0.15414)0.0:0.028794  
4,(((((((GB\_GCA\_004297575.1:0.337868,GB\_GCA\_014238095.1:0.437731)0.999:0.0524444,bin.598:  
0.438306):0.043298,GB\_GCA\_011363135.1:0.26205)0.363:0.0396764,(GB\_GCA\_011334385.1:0.2449  
78,GB\_GCA\_011335085.1:0.251477)1.0:0.0720262)'0.992:f\_\_SCSR01':0.0547262,((GB\_GCA\_0022545  
45.1:0.337113,GB\_GCA\_011333035.1:0.316878)0.273:0.0542413,GB\_GCA\_011047985.1:0.362758)'1  
.0:f\_\_EX4484-  
224':0.0698253)1.0:0.0913086,(GB\_GCA\_001784635.1:0.326879,GB\_GCA\_002789635.1:0.309634)'1.  
0:f\_\_CG10238-14':0.217555)'1.0:o\_\_CG10238-  
14':0.101811,(((GB\_GCA\_003663225.1:0.416103,GB\_GCA\_003663415.1:0.294303)'0.974:f\_\_QMZP01  
'0.0519901,GB\_GCA\_003663445.1:0.450774)0.193:0.0498011,((GB\_GCA\_011772645.1:0.355373,GB  
\_GCA\_013151465.1:0.435496)0.716:0.0524264,GB\_GCA\_003663325.1:0.340688)'1.0:f\_\_QMZT01':0.  
0765723)'1.0:o\_\_QMZP01':0.148884)0.969:0.045203,((GB\_GCA\_000405245.1:0.286116,GB\_GCA\_01  
1773475.1:0.261415)'1.0:f\_\_Aenigmatarchaeaceae':0.127991,GB\_GCA\_013152905.1:0.439097)'1.0:o  
\_\_Aenigmatarchaeales':0.147173)'0.87:p\_\_Aenigmatarchaeota;c\_\_Aenigmatarchaeia':0.0274076)0.9  
99:0.0688141,(((GB\_GCA\_000806115.1:0.16781,GB\_GCA\_013331845.1:0.178288)'1.0:g\_\_GW2011-  
AR5':0.166846,GB\_GCA\_903825675.1:0.352436)'1.0:f\_\_GW2011-  
AR5':0.0996342,GB\_GCA\_002688965.1:0.514522)1.0:0.128398,GB\_GCA\_011373045.1:0.540076)'0.9  
94:p\_\_Aenigmatarchaeota\_A;c\_\_Aenigmatarchaeia\_A;o\_\_GW2011-AR5':0.0669493)d\_\_Archaea;
